# Supplementary material for: Investigations into the Development of a Satellite-Based Aerosol Climate Data Record using ATSR-2, AATSR and AVHRR data
Source: Copernicus journal article supplement (doi:10.5194/amt-2019-26), 2019-01-22
Supplement: Supplementary file [file amt-2019-26-RC3-supplement.pdf]

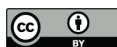

# Investigations into the Development of a Satellite-Based Aerosol Climate Data Record using ATSR-2, AATSR and AVHRR data

Yahui Che<sup>1,7</sup>, Jie Guang<sup>1</sup>, Gerrit de Leeuw<sup>2,4</sup>, Yong Xue<sup>1,3</sup>, Ling Sun<sup>5</sup>, and Huizheng Che<sup>6</sup>

<sup>1</sup> Key Laboratory of Digital Earth Science, Institute of Remote Sensing and Digital Earth, Chinese Academy of Sciences (RADI/CAS), Beijing 100094, China

<sup>2</sup> Finnish Meteorological Institute, Climate Research Programme, P.O. Box 503, FI-00101 Helsinki, Finland

<sup>3</sup> Department of Electronics, Computing and Mathematics, College of Engineering and Technology, University of Derby, Derby DE22 1GB, UK

<sup>4</sup> School of Atmospheric Physics, Nanjing University of Information Science and Technology, Nanjing 210044, China

<sup>5</sup> Key Laboratory of Radiometric Calibration and Validation Environmental Satellites (LRCVES/CMA), National Satellite Meteorological Center, China Meteorological Administration, Beijing 100081, China

<sup>6</sup> State Key Laboratory of Severe Weather and Institute of Atmospheric Composition, Chinese Academy of Meteorological Sciences, CMA, Beijing 100081, China

<sup>7</sup> University of Chinese Academy of Sciences, Beijing, 100049, China

15 *Correspondence to:* Jie Guang ([guangjie@radi.ac.cn](mailto:guangjie@radi.ac.cn)) and Gerrit de Leeuw ([Gerrit.Leeuw@fmi.fi](mailto:Gerrit.Leeuw@fmi.fi))

**Abstract.** Satellites provide information on the temporal and spatial distributions of aerosols on regional and global scales. With the same method applied to a single sensor all over the world, a consistent data set is to be expected. However, the application of different retrieval algorithms to the same sensor, and the use of a series of different sensors may lead to substantial differences and no single sensor or algorithm is better than any others everywhere and at any time. For the production of long-term climate data records, the use of multiple sensors cannot be avoided. The Along Track Scanning Radiometer (ATSR-2) and the advanced ATSR (AATSR) Aerosol Optical Depth (AOD) data sets have been used to provide a global AOD data record over land and ocean of 17-years (1995-2012), which is planned to be extended with AOD retrieved from a similar sensor, i.e. the Sea and Land Surface Temperature Radiometer (SLSTR) which flies on Sentinel-3A launched in early 2016. However, this leaves a gap of about 4 years between the end of the AATSR and the start of the SLSTR data records. To fill this gap, and to investigate the possibility to extend the ATSR data record to earlier years, the use of an AOD data set from the Advanced Very High Resolution Radiometer (AVHRR) is investigated. AOD data sets used in this study were retrieved from the ATSR sensors using the ATSR Dual View algorithm ADV v2.31 developed by Finnish Meteorological Institute (FMI), and from the AVHRR sensors using the ADL algorithm developed by RADI/CAR. Together these data sets cover a multi-decadal period (1983-2014). The study area includes two contrasting areas, both as regards aerosol content and composition and surface properties, i.e. a region over North-East (NE) China encompassing a highly populated urban/industrialized area (Beijing-Tianjin-Hebei) and a sparsely populated mountainous area.

Ground-based AOD observations available from ground-based sunphotometer AOD data in AERONET and CARSNET are used as reference, together with radiation-derived AOD data at Beijing to cover the time before sunphotometer observations became available in the early 2000's. In addition, MODIS-Terra C6.1 AOD data are used as reference data set over the wide area where no ground-based data are available. All satellite data over the study area were validated versus the reference data,

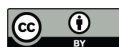

showing the qualification of MODIS for comparison with ATSR and AVHRR. The comparison with MODIS shows that AVHRR performs better than ATSR in the north of the study area (40°N), whereas further south ATSR provides better results. The validation versus sunphotometer AOD shows that both AVHRR and ATSR underestimate the AOD, with ATSR failing to provide reliable results in the winter time. This is likely due to the highly reflecting surface in the dry season, when AVHRR-retrieved AOD traces both MODIS and reference AOD data well. However, AVHRR does not provide AOD larger than about 0.6 and hence is not reliable in the summer season when high AOD values have been observed over the last decade. In these cases, ATSR performs much better, for AOD up to about 1.3. AVHRR-retrieved AOD compares favourably with radiance-derived AOD, except for AOD higher than about 0.6. These comparisons lead to the conclusion that AVHRR and ATSR AOD data records each have their strengths and weaknesses which need to be accounted for when combining them in a single multi-decadal climate data record.

## 1 Introduction

Aerosol particles are important atmospheric constituents, which play significant roles in many processes such as atmospheric chemistry, the absorption and scattering of solar radiation, and the lifetime of cloud and precipitation systems (Boucher et al., 2013; Koren et al., 2014; Guo et al., 2014; 2016a; 2018). Aerosol particles have an adverse effect on human health and are responsible for 7 million premature deaths annually over the whole world (WHO, 2018). Processes involving aerosols and their effects depend on the chemical and physical properties of the aerosol particles which in turn are determined by sources of directly emitted particles, the formation of aerosols from precursor gases (and thus the sources of these gases), the transformation of these particles during chemical and physical processes in the atmosphere and their removal by wet or dry deposition (cf. Seinfeld and Pandis, 1998, for a comprehensive treatment of aerosol processes). Aerosol particles can be emitted by natural processes such as the interaction between wind and waves which produces sea spray aerosol in quantities and composition which primarily depend on wind speed (e.g., O'Dowd and de Leeuw, 2007, de Leeuw et al., 2011), entrainment of dust into the atmosphere by the action of the wind producing desert dust aerosol (e.g., Yu et al., 2018, Alizadeh-Choobari et al., 2018), forest fires producing biomass burning aerosol (e.g., Miller et al., 2011, Kaiser et al. 2012), or volcanic eruptions producing volcanic ash (e.g. Lu et al., 2016). Wind-blown dust can also be of anthropogenic origin such as from agricultural or construction activities (e.g. Gillette, 1988) and biomass burning aerosol can be produced by anthropogenic activities such as straw burning (e.g. Zhang et al., 2016, Chen et al., 2018) or man-induced forest fires (Chen et al., 2018). Aerosols such as black carbon, produced from incomplete combustion, play an important role in atmospheric processes due to the absorption of solar light which affects the evolution of the atmospheric boundary layer and thus vertical mixing of air pollution. Precursor gases can be of both natural and anthropogenic origin. NO<sub>2</sub> is mainly formed from combustion processes but also natural sources contribute such as lightning (Stark et al., 1996) and soil emissions (e.g., Oertel et al., 2016). The SO<sub>2</sub> emissions from power plants have been largely reduced since the second half of the 20th century and over most of the world the concentrations are low (e.g. Fioletov et al., 2016), the occurrence of high SO<sub>2</sub> concentrations in

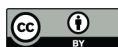

the atmosphere is used as a strong indicator of volcanic activity (e.g. Theys et al., 2013, Carn et al. 2017). Volatile organic compounds (VOCs) are emitted by plants and from anthropogenic sources and are nowadays identified as strong contributors to aerosol concentrations (e.g. Bai et al., 2018, Stavrou et al., 2016).

In addition to this large variety of sources, the aerosol concentrations vary strongly with meteorological conditions, which in turn are affected by large scale synoptic conditions and weather systems (Li et al., 2017a; Miao et al., 2017; Yim et al., 2019). The aerosol concentrations also vary with economic development such as industrialization, urbanization and the ensuing policy measures to reduce adverse effects on health and climate. Since the industrial revolution in the 18th century, the emission of air pollutants has been increasing until adverse effects were recognized and measures were developed and implemented to reduce emissions and concentrations of pollutants (e.g., Brimblecombe, 2006). In particular, in the second half of the 20th century the effects of SO<sub>2</sub> on forests and lakes, also known as acid rain, was recognized and measures were taken to reduce the SO<sub>2</sub> emissions ~~and thus restore nature~~. Later, the adverse effects of NO<sub>2</sub> emissions and effects of aerosols, especially fine particulate matter, on air quality, health and climate were recognized and reduced. These led to the reduction of air pollution in developed countries, in particular in North America and Europe (Guerreiro et al., 2014), but in developing countries with increasing industrial activity and urbanization the concentrations continued to increase (Hao et al., 2000). Examples are China and India where the concentrations of pollutants are amongst the highest in the world. Taking China as an example, recent publications show the effect of policy measures on the reduction of the most polluting trace gases SO<sub>2</sub> and NO<sub>2</sub> (van der A et al., 2017), which, as precursor gases, also affect the concentrations of aerosols. In particular, the emissions of SO<sub>2</sub> were reduced as part of the 11th Five-Year Plan (2006-2010) (Zheng et al., 2018), but the emissions of NO<sub>2</sub> continued to increase (e.g., van der A et al., 2017) until the 12th Five-Year Plan (2011-2015). Large emission reductions were achieved after 2013 when the Clean Air Action was enacted and implemented and the NO<sub>2</sub> concentrations decreased (Zheng et al., 2018). Starting from 2011, aerosol concentrations decreased in China as shown, e.g., from satellite observations of the aerosol optical depth (AOD) (Zhang et al., 2017, Zhao et al., 2017, de Leeuw et al, 2018, Sogacheva et al., 2018b).

Observations of the concentrations of trace gases and aerosols in China are publicly available since several observational networks have been established, such as CARE-China (Xin et al., 2015), and the NASA's AERONET (AERosol RObotic NETwork) (Holben et al. 1998) with observations mainly in the east of China, the Chinese CARSNET (Chinese Aerosol Remote Sensing Network) (Che et al., 2009; 2015) and SONET (Sun-sky radiometer Observation NETwork) (Li et al., 2018), all of which provide data across the whole country. However, most of these observations were established in the last decade and very few, if any, historical data on large scale are available for the construction of the long time series needed to show the evolution of pollutant concentrations over many years and analyse the effects of different contributions. Here, satellite data may offer a solution. The most common satellites used for the observation of trace gases and aerosols offer information since the beginning of the 21st century and, by combining the information from different instruments, time series encompassing two decades can be constructed (de Leeuw et al., 2018, Sogacheva et al., 2018b). Satellite information has been used together with model simulation to analyse the effects of natural and anthropogenic contributions on the



concentrations of trace gases and aerosols (Kang et al., 2018). In another study combining satellite data with ground-based observations, the role of precursor gases, in particular VOCs, and photochemical reactions in the formation of aerosols (PM<sub>2.5</sub>) was revealed (Bai et al., 2018).

In this study we focus on aerosols, and in particular on the AOD observed by satellites. The most common instrument used for aerosol retrieval is the Moderate Resolution Imaging Spectroradiometer (MODIS) which was launched on the Terra satellite, in a morning orbit with equator crossing time (descending) at 10:30 local time (LT), in December 1999 and on the Aqua satellite (ascending, equator crossing time 13:30 LT) in May 2002. MODIS thus provides an AOD time series since 2000 and is still operational. The Along Track Scanning Radiometer ATSR-2, a dual view instrument, was launched in 1995 on the European Space Agency (ESA) satellite ERS-2 and provided data until 2003. The Advanced ATSR (AATSR) is a similar instrument launched in 2002 on the ESA platform ENVISAT, which was lost in April 2012. The AOD over China from ATSR-2 and AATSR is consistent (Sogacheva et al., 2018a) and hence, together these instruments provide a 17-year AOD time series, 1995-2012 (Popp et al., 2016, de Leeuw et al., 2018). Combining ATSR and MODIS, 22-year AOD measurements were constructed, showing the AOD increased until about 2006, and then clear decreased since 2011 over China (de Leeuw et al., 2018, Sogacheva et al., 2018b). MODIS is approaching the end of its life time, but the AOD time series will be extended with NPP/VIIRS (cf. Levy et al., 2015). The AATSR time series will be extended with data from the operational Sea and Land Surface Temperature Radiometer (SLSTR) which was launched on Sentinel-3 in February 2016. This leaves a gap of about 4 years between AATSR and SLSTR. This gap could be filled with MODIS data, as described in Sogacheva et al. (2018b) who combined ATSR and MODIS/Terra (C6.1) data to construct an AOD time series 1995-2017. The objective of the current study is to investigate whether this can also be done by using AVHRR data, using the AOD data set over land which was recently presented by Xue et al. (2017). The advantage of using AVHRR data is the long time series which would allow extension back to the earliest AVHRR AOD retrievals available, in this case 1983, and thus construct a time series 1983-present. The Xue et al. (2017) data set encompasses only two relatively small areas over Europe and China, but covers the complete period, as opposed to the AVHRR global over land AOD data set recently presented by Hsu et al. (2017) and Sayer et al. (2017) which encompasses several distinct time periods. Hence we focus here on the Xue et al (2017) AVHRR AOD data set over China and compare that with ATSR-derived AOD data to determine its suitability for merging (as done for ATSR/MODIS by Sogacheva et al. 2018b), and thus extending both before the ATSR-2 era and after the AATSR era until SLSTR. In this study we use both ground-based reference data, from AERONET (Holben et al., 1988) and from CARSNET (Che et al, 2009, 2015), and MODIS C6.1 AOD data for comparison and evaluation. Reference data and MODIS/Terra data for inter-comparison are not available for the period before 2000 and therefore we also use radiance - derived AOD data (Xu et al., 2015, Guo et al, 2016b). Data sets and methods used are presented in section 2. An overview of the data and an evaluation of their quality are presented in section 3, including a comparison of the various data sets. The results are discussed and conclusions are presented in section 4.



## 2 Method

### 2.1 Study area

The study area is located over East China, i.e. between 110 ° and 120 ° E and 35 ° and 45 ° N (Fig. 1), which is divided into two sub-regions by the Taihang Mountain range with the North China Plain (NCP) and large urban agglomerations like Beijing and Tianjin and the Hebei province (together BTH) to the SE and the mountainous terrain to the NW extending over the Loess Plateau in Shanxi Province and the Inner Mongolia plateau. The Taihang mountain range forms a natural barrier for the transport of air pollution resulting in the frequent accumulation of pollutants and the occurrence of haze over the BTH area and the NCP (e.g., Sundström et al., 2012; Wang et al., 2013). The satellite-derived AOD maps in Fig. 2 show that this line also roughly divides high AOD in the SW of the study area and low AOD in the NW. The background in Fig. 1 is a land cover map showing that the major land cover types in the study area are croplands in the SE and grassland to the NW, which are intersected by mixed forest and closed shrublands as shown in the inset in Fig. 1.

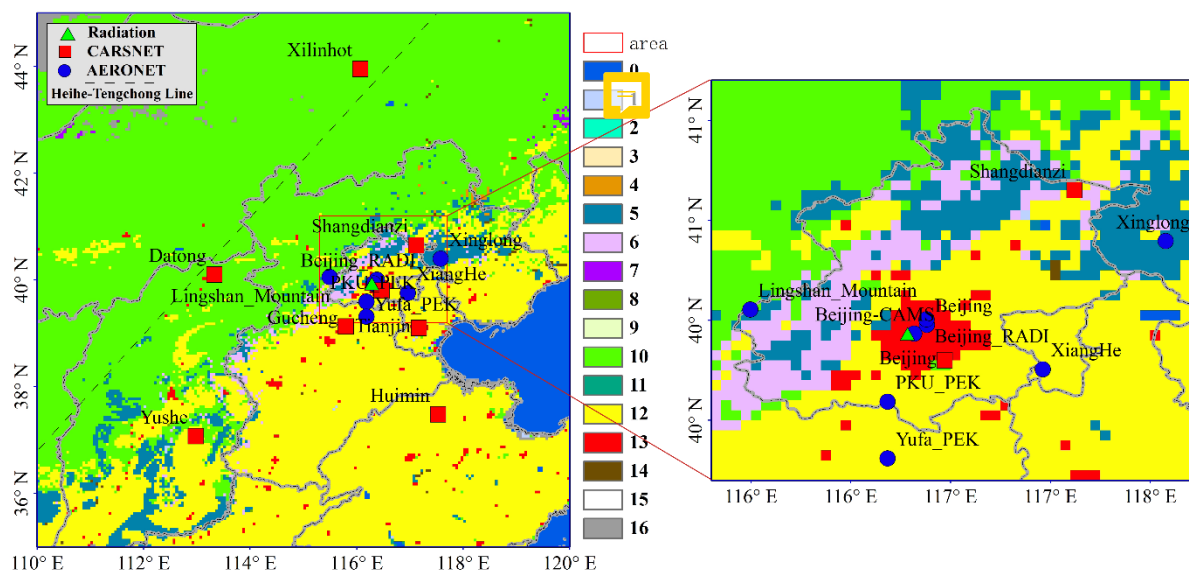

**Figure 1:** Study area, with the locations of the ground-based reference sites discussed in Sect. 2.3 (CARSNET: red squares, AERONET: blue circles, solar radiation station: green triangle) overlaid on the IGBP land cover map. Land cover is colour coded, see the legend to the right of the map: Water (0), Evergreen Needleleaf forest (1), Evergreen Broadleaf forest (2), Deciduous Needleleaf forest (3), Deciduous Broadleaf forest (4), Mixed forest (5), Closed shrublands (6), Open shrublands (7), Woody savannas (8), Savannas (9), Grasslands (10), Permanent wetlands (11), Croplands (12), Urban and built-up (13), Cropland/Natural vegetation mosaic (14), Snow and ice (15) and Barren or sparsely vegetated (16).

### 2.2 Satellite data

Satellite-retrieved data sets used in this study are satellite-derived AOD data from six radiometers, i.e. AVHRR-1, AVHRR-2, AVHRR-3, ATSR-2, AATSR and MIS. These data sets are briefly discussed below.



### 2.2.1 AVHRR

The AVHRR instruments flew on a series of satellites, most of them with an afternoon equator crossing time at 13:40 LT (ascending) (see Xue et al., 2017, for an overview). AVHRR has a swath width of 2900 km (<https://earth.esa.int/web/guest/missions/3rd-party-missions/current-missions/noaa-avhrr>) and thus provides daily global coverage. The AVHRR sensor was designed for measuring cloud cover and surface temperature, but the observations are also used for the retrieval of AOD over ocean (e.g. Zhao et al., 2008), with only few efforts to retrieve the AOD over land. Recently two AOD data sets retrieved from AVHRR observations over land were published, the first one by Xue et al. (2017) and short after another one by Sayer et al. (2017) and Hsu et al (2017). Xue et al. (2017) used the Algorithm for the retrieval of the aerosol optical Depth over Land (ADL) which was used to produce the continuous data set over China used in the current study. The use of AVHRR data for aerosol retrieval requires a re-calibration of the radiances measured at the top of the atmosphere (TOA) because the sensors have no in-flight calibration. Xue et al. (2017) describe how this was achieved. Major problems in the retrieval of AOD from satellite observations is the effective decoupling of atmospheric and surface effects on the reflectance measured at the top of the atmosphere (TOA), cloud detection and the description of the aerosol properties. In the ADL algorithm a cloud mask is applied based on the Clouds from AVHRR (CLAVR, Stowe et al., 1991, 1999) and in the retrieval six aerosol types are used as proposed by Govaerts (2010). For cloud-free pixels, and after application of gas absorption corrections as described in Xue et al. (2017), the land surface reflectance in the AVHRR channel 1 (0.64  $\mu\text{m}$ ) is parameterized in terms of the measured reflectance in Channel 3 (3.75  $\mu\text{m}$ ), with coefficients which are functions of the NDVI and scattering angle. The aerosol extinction at 3.75  $\mu\text{m}$  is assumed to be negligible (which may not be true in the presence of coarse aerosol particles such as for desert dust or sea spray aerosol). It is noted that the TOA reflectance at 3.75 $\mu\text{m}$  is composed of solar radiation reflected by the land/atmosphere system and Earth radiation. The reflected part is estimated by using the method proposed by Allen et al. (1990). For each land cover type, as determined following the International Geosphere-Biosphere Programme (IGBP) land cover classification, a different parameterization of the 0.64  $\mu\text{m}$  reflectance was developed. The IGBP land cover information used is the MODIS MCD12C1 product obtained from [https://lpdaac.usgs.gov/dataset\\_discovery/modis/modis\\_products\\_table/mcd12c1](https://lpdaac.usgs.gov/dataset_discovery/modis/modis_products_table/mcd12c1), and is described in the MOD12 product ATBD ([https://modis.gsfc.nasa.gov/data/atbd/atbd\\_mod12.pdf](https://modis.gsfc.nasa.gov/data/atbd/atbd_mod12.pdf)).

In the implementation of the ADL algorithm, the land surface reflectance is coupled to a radiative transfer model which includes individual parameterizations of the direct, single-scattered and multiple-scattered radiances. Thus a model is developed for the TOA reflectance which is solved by optimal estimation. For more detail, see Xue et al., (2017). AOD is retrieved at a wavelength of 0.64  $\mu\text{m}$  at a spatial resolution of  $0.05^\circ \times 0.05^\circ$ . In this study AOD retrieved from NOAA-10 (1987-1991), NOAA-12 (1992-1998), NOAA-15 (199-2002), NOAA-17 (2003-2009), and TETOP-A (2010-2014) is used.





### 2.2.2 ATSR (ATSR-2 and AATSR)

Two Along-Track Scanning Radiometers (together referred to as ATSR) are used in this study: the ATSR-2, which flew on ESA's ERS-2 from 1995-2003, and the Advanced ATSR (AATSR), which flew on ESA's environmental satellite ENVISAT and provided data from May 2002 until April 2012. Both satellites flew in a sun-synchronous descending orbit with a day-time equator crossing time of 10:30 LT (ERS-2) and 10:00 LT (ENVISAT). Together these instruments provided 17 years of global aerosol data. The ATSR sensor has two views (near-nadir and 55° forward) which facilitate effective separation of the surface and atmospheric contributions to the reflectance at TOA. Multiple wavelengths (7) from VIS to TIR facilitate effective cloud screening and allow for multi-wavelength retrieval of aerosol properties. ATSR has a conical scan mechanism with a swath of 512 km resulting in daily global coverage in 5- 6 days.

The ATSR dual view was first applied for AOD retrieval over land by Veefkind et al. (1998), based on the principles outlined by Flowerdew and Haigh (1995). Over ocean the two views are used separately to retrieve the AOD in both the nadir and forward directions. The ATSR dual view algorithm (ADV) has been much improved during algorithm experiments (Holzer-Popp et al., 2013) as part of the ESA Climate Change Initiative (cci) (Hollmann et al., 2013) project Aerosol\_cci (de Leeuw et al., 2015, Popp et al., 2016). The most recent version of the ATSR dual view algorithm ADV is described in Kolmonen et al. (2016). ATSR L1 gridded brightness temperature data are provided with a nominal resolution of 1x1 km<sup>2</sup> sub-nadir and aerosol data are provided at a default spatial resolution of 10x10 km<sup>2</sup> on a sinusoidal grid (L2) and at 1° x 1° (L3).

The ATSR product used in this paper is the AOD at a wavelength of 550 nm, over the study area for the full ATSR mission. The data were produced using ADV version 2.31 which includes cloud post-processing as described in Sogacheva et al. (2017). ATSR-2 retrieved AOD data are available for the period June 1995- December 2003, with some gaps in 1995 and 1996. AATSR data are available for the period May 2002 - April 2012, but some data are missing in 2002 (see de Leeuw et al., 2018, for more details).

### 2.2.3 MODIS

The MODerate resolution Imaging Spectroradiometer (MODIS) flies aboard the NASA Terra and Aqua satellites, launched in December 1999 and May 2002, respectively, in a near-polar sun-synchronous circular orbit with an equator crossing time of 10:30 and 13:30 (LT), respectively (Salomonson et al., 1989). MODIS is a single view instrument with a swath of 2330 km (cross track) and provides near-global coverage on a daily basis. One of the most successful products of MODIS, which has been used in numerous aerosol related studies, is the AOD at 550 nm.

MODIS AOD is retrieved using two separate algorithms, Dark Target (DT) and Deep Blue (DB). In fact, two different DT algorithms are utilized, one for retrieval over land (vegetated and dark-soiled) surfaces (Kaufman et al., 1997, Remer et al., 2005, Levy et al., 2010, 2013) and one for retrieval over water surfaces (Tanré et al., 1997, Remer et al., 2005, Levy et al.,



2013). The DB algorithm (Hsu et al., 2004, 2013) was traditionally used over bright surfaces where DT cannot be used (e.g. deserts, arid and semi-arid areas). However, the enhanced DB algorithm is capable of returning aerosol measurements over all land types (Sayer et al., 2013, 2014). The DT Expected Error (EE) is  $\pm(0.05+0.15\tau_{\text{AERONET}})$  over land and  $+(0.04+0.1\tau_{\text{AERONET}})$ ,  $-(0.02+0.1\tau_{\text{AERONET}})$  over sea relative to the AERONET optical thickness ( $\tau_{\text{AERONET}}$ ) (Levy et al., 2013).  
5 The DB expected error is  $\sim\pm(0.03+0.2\tau_{\text{MODIS}})$  relative to the MODIS optical thickness ( $\tau_{\text{MODIS}}$ ) (Hsu et al., 2013, Sayer et al., 2015). In this study the recently released (end of 2017) MODIS/Terra merged C6.1 L2 ( $10\times 10\text{ km}^2$ ) AOD dataset is used because of the proximity of the MODIS/Terra and AVHRR overpasses. The merged (DT and DB) dataset is described by Levy et al. (2013) and includes measurements from both algorithms, offers a better spatial coverage and can be used in quantitative scientific applications (Sayer et al., 2014). This merged data set was validated over China using AERONET data,  
10 showing the good performance for all retrieved AOD values up to 2.4, with a small overall bias of 0.06 (Sogacheva et al., 2018a).

### 2.3 Ground-based reference data

Ground-based reference data used in this study are sunphotometers from AERONET (Holben et al., 1998) and CARSNET (Che et al., 2015) available in the study area (see Fig. 1), complemented with radiance-derived AOD data in Beijing for the  
15 period when no sunphotometer data are available. The eight AERONET sites in the study area are all located in, or close to, Beijing. Three of them (Beijing, Beijing\_RADI, and PKU\_PEK) are located in the city, the others are located in rural areas in the vicinity of Beijing. The eight CARSNET sites are distributed over a wider area extending beyond BTH, with two of them (Xilinhot and Datong) located to the NW of the Heihe-Tengchong line, Huimin in the NCP and Yushe in rural areas surrounded by mountains. The other four (Lingshan\_Mountain, XiangHe, Xinglong, and Yufa\_PEK) are in and around  
20 Beijing. The solar radiation station is located in Beijing, close to three AERONET sites (Beijing, Beijing\_RADI, Beijing\_CMA).

The AERONET, CARSNET and radiation-derived AOD data sets are briefly described below.

#### 2.3.1 AERONET

The AERONET project is a federation of ground-based remote sensing aerosol networks established by the National  
25 Aeronautics and Space Administration (NASA) in the USA and PHOTométrie pour le Traitement Opérationnel de Normalisation Satellitaire (PHOTONS) in France. AERONET was expanded with other networks and national efforts, see the AERONET website (<https://aeronet.gsfc.nasa.gov/>) for a description of contributors, sites, operational procedures, data products and availability, etc. AERONET serves as the primary network for global validation of satellite-retrieved aerosol products, including AOD which is used in this study. AOD at all AERONET stations is measured using CIMEL  
30 sunphotometers. Most common are the CIMEL CE-318 models with 5 wavelengths (440, 670, 870, 936 and 1020 nm) or polarized with 8 wavelengths, measuring direct sun as well at many angles using different scan patterns which provide the





data necessary to retrieve a multitude of aerosol properties. Data checking and processing is done centrally and the products are freely available from the AERONET website. Data are made available at three levels, i.e. Level 1.0 (unscreened), Level 1.5 (cloud-screened), and Level 2.0 (L2) (cloud-screened and quality-assured). The uncertainty of the CIMEL-derived AOD is 0.01-0.02 (wavelength dependent) (Eck et al., 1999). In this study we use AERONET L2 data from the most recent V3 dataset for validation and comparison. Satellite AOD data are commonly made available at 550 nm, and hence, for validation, the AERONET data are interpolated to this wavelength by using the Ångström Exponent (AE) which describes the AOD wavelength dependence (Ångström, 1924).

Almost all AERONET sites in the study area started observations after 2000 as Tab. 1 shows. Long-time and continuous measurements from 2001 to 2014 are only available from the Beijing and XiangHe stations. Therefore, we selected these stations for comparison with satellite time series, but for validation all available data are used.

**Table 1.** Data availability from AERONET sites in the study area (35 °45 N, 110 °120 E)

|                   | 2001 | 2002 | 2003 | 2004 | 2005 | 2006 | 2007 | 2008 | 2009 | 2010 | 2011 | 2012 | 2013 | 2014 |
|-------------------|------|------|------|------|------|------|------|------|------|------|------|------|------|------|
| Beijing           | ✓    | ✓    | ✓    | ✓    | ✓    | ✓    | ✓    | ✓    | ✓    | ✓    | ✓    | ✓    | ✓    | ✓    |
| Beijing-CAMS      |      |      |      |      |      |      |      |      |      |      |      | ✓    | ✓    | ✓    |
| Beijing_RADI      |      |      |      |      |      |      |      |      |      | ✓    | ✓    |      |      |      |
| Lingshan_Mountain |      |      |      |      |      |      |      |      |      |      |      |      |      | ✓    |
| XiangHe           | ✓    |      |      | ✓    | ✓    | ✓    | ✓    | ✓    | ✓    | ✓    | ✓    | ✓    | ✓    | ✓    |
| Xinglong          |      |      |      |      |      | ✓    | ✓    | ✓    | ✓    | ✓    | ✓    | ✓    |      | ✓    |
| PKU_PEK           |      |      |      |      |      | ✓    |      | ✓    |      |      |      |      |      |      |
| Yufa_PEK          |      |      |      |      |      | ✓    |      |      |      |      |      |      |      |      |

### 2.3.2 CARSNET

AERONET sites in the study area are all located in or around Beijing (cf. Fig. 1). To expand the reference data set to other regions, AOD data from CARSNET (Che et al., 2015) was used, but only data for the years 2007, 2008 and 2010 were available for this study. The locations of the CARSNET sites in the study area are indicated in Fig. 1. CARSNET was established by the China Meteorological Administration (CMA) for the study of aerosol optical properties and validation of satellite retrievals, and the same instrumentation as AERONET (i.e. CIMEL CE-318) and similar procedures (Che et al., 2015). The difference is the way of instrument calibration and AOD calculation as described in Che et al. (2009). The CARSNET AOD uncertainties are 0.03, 0.01, 0.01 and 0.01 at the 1020, 870, 670 and 440 nm channels (Che et al., 2009).



### 2.3.3 Radiation-derived AOD data

Broadband solar radiation has been measured in China by China Meteorological Administration (CMA) since the 1950s at 98 sites (Qiu, 1998) which evolved into the China national solar radiation network with 14 stations (Xu et al., 2015) providing continuous data since 1993 using China-made pyrhemometers. Methods were developed to retrieve  
5 monochromatic or equivalent AOD using hourly accumulated direct solar radiation and the results of these broadband extinction methods (BEM) are in good agreement with sunphotometer data (see Xu et al., 2015 for an overview). In the current study we used AOD at 550 nm retrieved from the pyrhemometer measurements of broadband solar radiation at the Beijing station (Fig. 1) of the China national solar radiation network. These data are particularly useful for evaluation of the AVHRR-retrieved AOD for the period before 2000 when no sunphotometer data were available. The AOD was retrieved  
10 using the method described by Xu et al. (2015). Xu et al. (2015) evaluate the quality of the BEM-derived AOD (at 750 nm) for the Beijing station from comparison with AERONET AOD. The results show that 59% of the hourly AOD data fall within an error envelope of  $\pm(0.05+0.15\tau_{\text{AERONET}})$ . For monthly averaged data this is 82%. Guo et al (2016) used the BEM-derived hourly mean AOD at 550 nm to evaluate the products from MODIS, OMI and MISR, obtaining consistent results with previous validations based on sunphotometer measurements, which proved the effectiveness of the radiation-derived  
15 AOD in satellite product validation.

## 3 Result

### 3.1 Data overview

The aim of the present study is to determine the compatibility of AVHRR and ATSR AOD data sets and their suitability to  
20 combine them to fill the gap between AATSR and SLSTR, as well as to extend the ATSR time series to the 1980s. AVHRR AOD data is available over the study area from the ADL algorithm for the years 1983-2014 (Xue et al., 2017) and from ATSR-2 and AATSR using the ADV algorithm for the years 1995-2003 (ATSR-2) and 2002-2012 (AATSR), with some gaps as described in de Leeuw et al. (2018). The consistency between ATSR-2 and AATSR AOD is addressed in Sogacheva et al. (2018a) who show that no systematic differences occur over China. In the current work we also use MODIS/Terra C6.1  
25 merged DTDB AOD for comparison. The validation of this data set over China by Sogacheva et al. (2018a), using all available AERONET stations, shows it's good quality, with a small positive bias (0.06) with respect to AERONET AOD. As an example, AOD maps over the study area are shown in Fig. 2, aggregated for the full years 2000-2011 when data from all three sensors/algorithms are available: AATSR (ADV v2.31, L2, resolution 10x10 km<sup>2</sup>), AVHRR (ADL, resolution 0.05 °x 0.05 °) and MODIS C6.1 Merged DBDT (L2, resolution 10x10 km<sup>2</sup>).

30 Figure 2 shows the similar AOD patterns derived from the three sensors/algorithms, with high AOD in the SE part of the study area and lower elsewhere. As indicated above, these high and low AOD areas are roughly separated by the Heihe-



Tengchong line which separates the NCP from the Loess Plateau in Shanxi Province and the Inner Mongolia Plateau. In the SW of the study area, in Shanxi Province, we see an area with elevated AOD stretching from the NE to the SW, i.e. in the Guanzhong basin where pollution transported by NE winds from the BTH area accumulates between the Qinling Mountains and the Loess Plateau and mixes with locally produced pollution. Comparison of the spatial distribution shows the similarity of the AOD distributions for AVHRR and MODIS while for AATSR the spatial distribution deviates with low AOD over Inner Mongolia, i.e. over the Gobi desert with high surface reflectance. ADV AOD retrieval is known to often be unsuccessful over bright areas and hence also aggregated AODs are too low (de Leeuw et al., 2018, Sogacheva et al., 2108a). AVHRR ADL appears to produce more credible AOD values in such conditions, as suggested by the similarity of the AOD patterns to those from MODIS. Below this statement will be put in perspective with the validation results from the ground-based reference data set.

Quantitatively, Figure 2 shows that in the south of the study area, i.e. south of 41° N, the MODIS AOD is overall higher than that retrieved from AATSR which in turn is overall somewhat higher than that from AVHRR. The smoother MODIS AOD, likely due to the larger number of data points because of the larger swath, together with the higher AOD and the scales chosen to plot the AOD maps, results in larger variability and patterns which are not as clearly revealed by AATSR and AVHRR. North from 41° AATSR AOD retrievals are often not successful so a quantitative comparison cannot be made at these latitudes. As regards the comparison of the other two sensors north of 41° N MODIS is overall higher than AVHRR, except, for instance, over an area in Inner Mongolia just north of 41° N where the MODIS AOD is close to zero while AVHRR provides AOD values between 0.1 and 0.2.

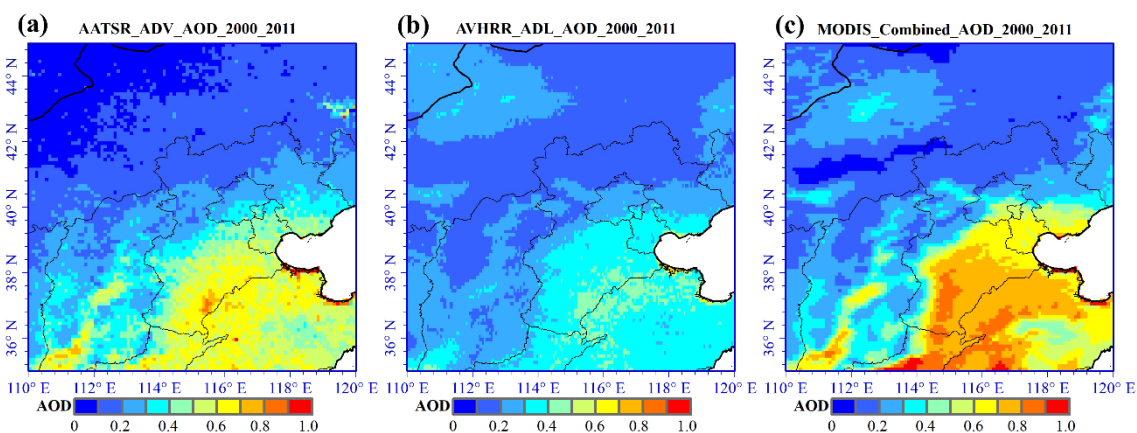

20 **Figure 2: AOD over the study area retrieved from AATSR (ADV v2.31, L2, 10x10 km<sup>2</sup>), AVHRR (ADL, 0.05 o x 0.05o) and MODIS C6.1 Merged DTDB (MODIS C6.1, L2, 10x10 km<sup>2</sup>), aggregated over the years 2000-2011.**

Below the satellite AOD data will be validated versus the ground-based reference data from AERONET and CARSNET, for all stations available in the study area, as indicated above. The AVHRR data will also be compared with the radiation-derived AOD data available from the Beijing station which are especially useful for the earlier period when no other



reference data are available. Next the satellite-derive AOD time series will be compared with the reference data to evaluate for each of the data sets when they are most useful. For AVHRR and MODIS, with wide swath, this will be done using monthly averaged AOD. For ATSR, with a much smaller swath, the data volume is too small for monthly averaging in a statistically meaningful sense and therefore seasonal averages will be used. In the direct comparison of monthly time series from other sensors, this may lead to an apparent shift in the AOD peak values.

### 3.2 Data quality: validation

#### 3.2.1 Procedure

The MODIS and ATSR AOD data sets used in this study have been validated versus sunphotometer reference data, on global and regional scales. With a focus on China, the ATSR v2.31 and MODIS C6.1 have been validated using AERONET data, for mainland China, for ten regions across China and for different seasons (de Leeuw et al., 2018, Sogacheva et al., 2018a). However, as shown in de Leeuw et al. (2018) and Sogacheva et al. (2018a), strong regional differences occur in both the seasonal and long-term AOD variations. Therefore, to achieve an unbiased comparison between the different data sets over the current study area, the MODIS C6.1 and ATSR data used in this study are validated versus the available reference data, together with the AVHRR data. The ADL data over the study area was earlier validated by Xue et al. (2017), but only AERONET stations were used while in the current study the complementary information (AOD) from CARSNET is also used.

Collocation of satellite and reference data is important for validation. Here we follow the spatio-temporal collocation method proposed by Ichoku et al., (2002), i.e. the satellite data were averaged over an area of 5 x 5 pixels (ca. 50 x 50km<sup>2</sup> at nadir) around the sunphotometer location, whereas the sunphotometer data were averaged over ±30 min around satellite overpass time. This spatio-temporal collocation method has been widely used for the validation of satellite aerosol products, for instance for MODIS (Ichoku et al., 2002, Chu et al., 2002, Remer et al., 2005, Levy et al., 2010, Sayer et al., 2014), AATSR (Che et al., 2016), and AVHRR (Riffler et al., 2010, Xue et al., 2017).

In the data presentation and discussion expected error (EE) envelopes are used which apply to MODIS over land, i.e. expected errors of  $\pm(0.05+0.15\tau_{\text{AERONET}})$  (Levy et al., 2013). For comparison, this value is also used for ATSR and AVHRR although the actual expected error envelopes for these sensors, which were not designed for aerosol retrieval, is expected to be higher than for MODIS. For ATSR a per-pixel uncertainty is provided rather than EE (Kolmonen et al., 2016) and for the AVHRR ADL (Xue et al., 2017) uncertainties have not been estimated.

The Beijing solar radiation station is located to the SW of the Beijing AERONET site at a distance of approximately 20km. AOD differences at these two sites are likely to occur due to emissions and secondary formation processes over this urban area, but these have not been accounted for in the current study where collocations include averages over areas larger than



the separation between these sites. Therefore, radiation-retrieved AOD is directly compared to the sunphotometer AOD as was done by Xu et al. (2015).

### 3.2.2 Results

Figure 3 shows scatterplots of AOD, for each of the three data sets individually, versus ground-based AOD reference data from all AERONET and CARSNET (3 years: 2007, 2008 and 2010) sites in the study area. Large differences occur between the three data sets. Starting with MODIS/Terra C6.1 merged DTDB, which has the largest number of collocations, the scatterplot in Fig. 3a shows the excellent performance for AOD up to 1.3 with the bin-averaged AOD less than 0.05 below the identity line and 69.5% of all data points within expected error of  $\pm(0.05+0.15\tau_{\text{AERONET}})$ . For AOD of 1.3 and larger the bin-averaged AOD values are much lower than the reference values, although still within one standard deviation. For AOD > 2.6, MODIS does provide values but they are all well below the identity line. These results indicate that MODIS C6.1 AOD over the study area is reliable for AOD up to 1.3, but for higher AOD their use is not recommended.

ATSR with a swath width of 500 km provides much less collocations than MODIS but the large difference in performance (compare Fig. 3a and 3c) cannot be explained by the swath alone and is likely due to the failure of ADV to provide a retrieval over bright surfaces and the underperformance in the winter with dry conditions, low humidity, little precipitation, low light levels and limited or no plant growth resulting in relatively high surface reflectance. Figure 3b shows that ADV provides AOD values up to 2.7 but for AOD > 1.3 the values are widely scattered around the identity line with large deviations from the sunphotometer values. Also for lower AOD a systematic underestimation is observed which increases with the AOD value up to 0.8 where the ADV-retrieved AOD is about 0.3 low. For larger AOD, up to 1.3, ADV continues to underestimate the AOD with a similar amount. Although 52% of the data points are within the EE, ADV clearly underestimates the AOD over this area and the bin-averaged AOD follows the lower EE limit rather than the identity line, for AOD up to 1.0, leading to the conclusion that ADV AOD is about 0.15 x AOD low.

AVHRR with a swath width of 2900 km is expected to provide the largest number of collocations but actually it is about 20% lower than for MODIS, likely due to failure of ADL to provide a valid retrieval in all situations. ADL does not provide retrievals for AERONET AOD > 2 and the data in Fig. 3a show the large scatter around the identity line and the large underestimation for AOD > 0.5. For AOD larger than about 0.8, the binned ADL AOD data deviate from the identity line by more than the expected error. For AOD up to 0.5, the bin-averaged values are within the EE (58.1% of the data), but systematically deviate from the identity line and underestimation increases with increasing AOD.

In conclusion, in the study area, MODIS provides reliable AOD for values up to 1.3 with a slight underestimation. This is in contrast with the findings of Sogacheva et al. (2018a) who observed a slight overestimation (bias 0.06) of the MODIS/Terra C6.1 merged DTDB AOD using all AERONET data available over China, but no CARSNET. Also for ATSR ADV v2.31 data the validation presented in de Leeuw et al. (2018), also using only AERONET data similar to Sogacheva et al. (2018a), deviates from that presented here, with a slight underestimation resulting in a bias of 0.07. Clearly the selection of the

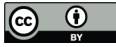

smaller study area affects the validation results, with for MODIS slight better results (smaller bias) than over all China, but for ATSR ADV the performance is less good. AVHRR AOD shows a large scatter and does not follow the identity line even for low values, underestimates for AOD larger than 0.5 and appears to fail for AOD larger than about 0.8.

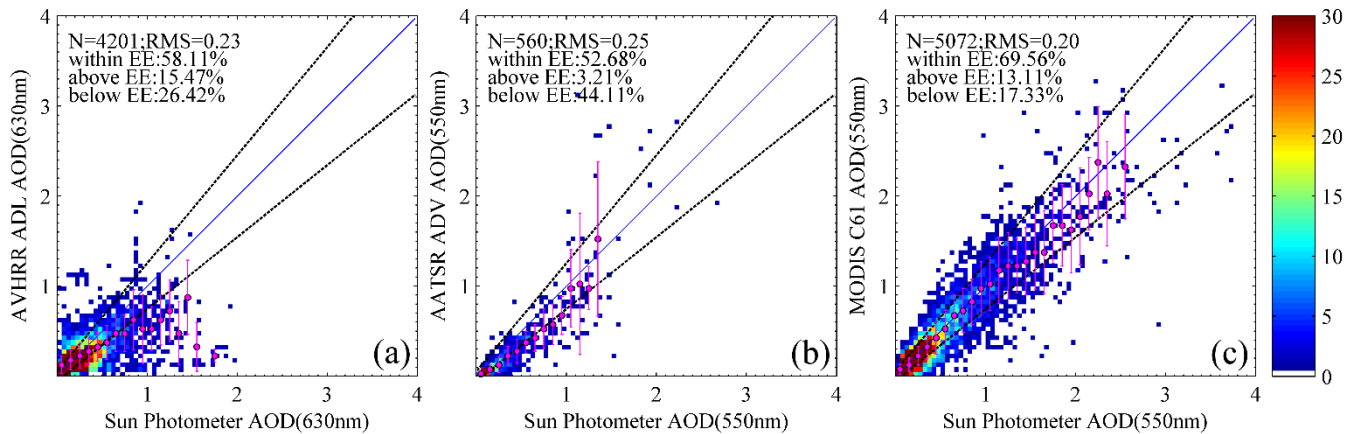

5 **Figure 3:** Scatter density plots of satellite-retrieved AOD versus sunphotometer retrieved AOD data from AERONET (all available data) and CARSNET (3 years: 2007, 2008 and 2010) stations in the study area. The red symbols represent the averaged satellite-retrieved AOD binned in 0.1 sunphotometer AOD intervals and the vertical lines on each circle represent the 1-sigma standard deviation of the fits. The colour bar on the right indicates the number of data points. Parameters for a LSQ fit to all data points are presented in the upper left corner, where N is the total number of collocated pairs and RMS is the root mean square error. The blue line represents the identity line and the black dotted lines represent the MODIS EE.

**Table 2.** Metrics obtained from the evaluation of three AOD products. N is number of collocated data points, MSA is mean satellite retrieved AOD, MAA is mean sunphotometer (AERONET and CARSNET) derived AOD, RMB is the ratio MAA/MSA. MBE is mean of AOD bias given by  $\tau_{sat} - \tau_{aero}$ . R is the Pearson correlation coefficient for a LSQ fit to all data points. RMS is the root mean square error. EE is the expected error, EE\_a is the fraction above the EE, EE\_b is the fraction below the EE.

15

| Product | Network   | N    | MSA   | MAA   | RMB   | MBE    | RMS   | R     | EE     | EE_a   | EE_b   |
|---------|-----------|------|-------|-------|-------|--------|-------|-------|--------|--------|--------|
| MODIS   | AERO&CARS | 5072 | 0.441 | 0.464 | 0.950 | -0.023 | 0.204 | 0.910 | 69.56% | 13%.11 | 17.33% |
| ADV     | AERO&CARS | 560  | 0.289 | 0.396 | 0.729 | -0.107 | 0.252 | 0.843 | 52.68% | 3.21%  | 44.11% |
| AVHRR   | AERO&CARS | 4201 | 0.237 | 0.296 | 0.802 | -0.059 | 0.229 | 0.602 | 58.11% | 15.47% | 26.42% |

Seasonal scatterplots are presented in the Appendix and discussed in the context of the seasonal variations observed in the AOD time series presented below.

### 3.3 Comparison of satellite-derived AOD time series with reference data

In this section time series of satellite-retrieved AOD data will be compared with time series available from the AERONET sites in Beijing and XiangHe, for which the longest time series are available, and with AOD derived from radiances measured at the Beijing radiation station.





### 3.3.1 AERONET AOD in Beijing

AOD time series for the period 2000-2015, retrieved from AVHRR, ATSR and MODIS data and spatially collocated with the Beijing AERONET site, are presented in Fig. 4 together with monthly-averaged AERONET AOD for reference. The time series presented here start in 2000 because for the earlier years no AERONET and MODIS data are available. The data in Fig. 4 show that AVHRR is almost always lower than AERONET and that the high AOD values obtained from AERONET, usually in the summer, are not reproduced by AVHRR. This is not unexpected since the scatterplots in Fig. 3 show that AVHRR fails to retrieve high AOD. For these individual data points hardly any values larger than 1 were retrieved and hence the monthly averages in Fig. 4 are lower than that. Figure 4 shows that the highest AVHRR AOD values of about 0.8 occur in 2002 and 2003 and thereafter do not exceed 0.6. The monthly averaged AERONET AOD peak values occur mostly in the summer and are about 1.4. However, in other seasons the differences are much smaller and the two time series seem to trace rather well with an offset of about 0.1. In particular in the winter AVHRR AOD is close to the reference value. These seasonal differences are confirmed by the scatterplots presented in the Appendix. The results lead to the conclusion that, for the Beijing site, for low AOD the ADL algorithm provides quite reasonable results but for high AOD improvement is needed to provide reliable time series.

The MODIS data in Fig. 4 trace the AERONET AOD very well, both in the summer and in other seasons, with MODIS AOD often just a little smaller as can also be observed from the scatterplots in the Appendix. This shows that MODIS serves as a good reference for the situation encountered at the Beijing site.

This does not apply to the ATSR AOD. Although ATSR AOD variations follow those from AERONET, and even reproduce the high summer values in some years (2007 and 2011), the ATSR values are most of the time smaller and especially in the winter the ATSR AOD is much too low. As discussed before, this may be due to the failure of ADV to produce a valid retrieval over bright surfaces.

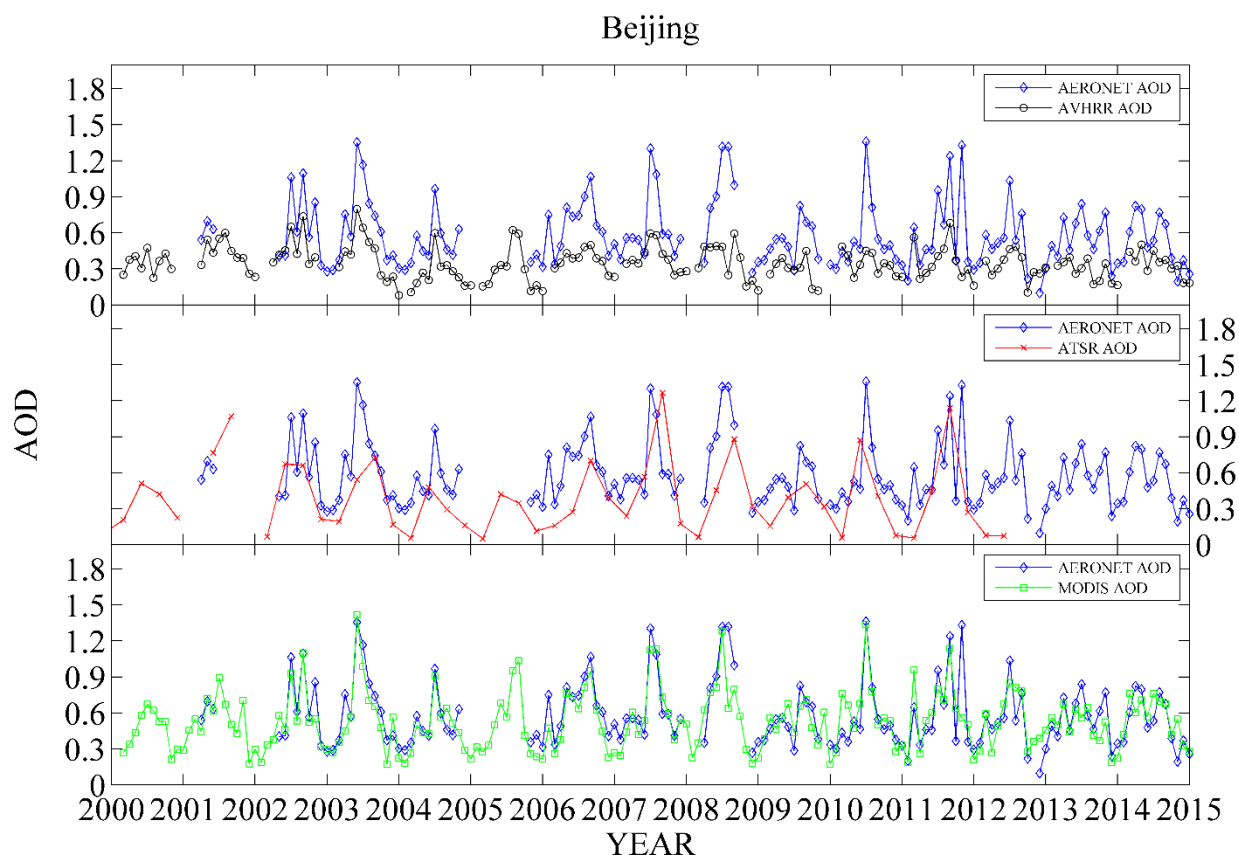

**Figure 4:** AOD time series for AVHRR (top), ATSR (middle) and MODIS (bottom), with AERONET AOD (blue) as reference, over the Beijing site for the years 2000-2015. For ATSR seasonally averaged AOD is plotted, for AVHRR and MODIS the AOD data are monthly averages.

### 5 3.3.2 AERONET AOD in XiangHe

Figure 5 shows a comparison of the AOD time series over the XiangHe AERONET site, similar to that over Beijing in Fig. 4. It is noted that, for comparison, in both cases the time series are plotted for the years 2000-2015, but that the XiangHe time series start at the end of 2004 (except for a few data points in 2001), i.e. later than in Beijing. Comparison of the AERONET time series shows that over XiangHe the AOD in the summer is somewhat higher and peaks often in the same years as over Beijing, but there are also differences such as in 2008 when the AOD in XiangHe reached the maximum monthly-averaged value of 1.5. As in Beijing, the AVHRR retrieval did not reproduce these high values in the summer, but for the other months the AVHRR/AERONET comparison is better than in Beijing and, with some exceptions, the AOD data trace very well. The seasonal scatter density plots in the Appendix, Fig. A3, confirm that no high AOD is retrieved in the summer, as opposed to other seasons. These scatterplots also confirm the underestimation of ADL, by about one EE, in each of the seasons except in the winter where ADL performance compares better to AERONET.

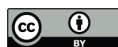

In contrast, the ATSR retrieval algorithm does reproduce the higher values, and in some years the seasonally averaged AOD compares favourably with the AERONET AOD (e.g. in 2007 and 2011), but in other years, such as 2008 and 2010 the maximum AOD is not observed by AATSR, which in part may be due to the seasonal averaging. Also, as over Beijing, ATSR retrieval does not work well in the winter time, possibly due to the high surface reflectance in the dry season, and the seasonal AOD is much lower than AERONET.

For MODIS the AOD compares well with AERONET but not as good as over Beijing. During some periods, e.g. in 2005 and during 2008-2011, MODIS is too high. This is also shown by the validation results in the Appendix. The reason for this difference between Beijing and XiangHe, which is located close to Beijing to the ESE (see Fig. 1), has not been further investigated. Possibly, the surface properties, urban and build-up for Beijing versus cropland for XiangHe, may affect the retrieval results as was also indicated in de Leeuw et al. (2018), but for MODIS C6.0.

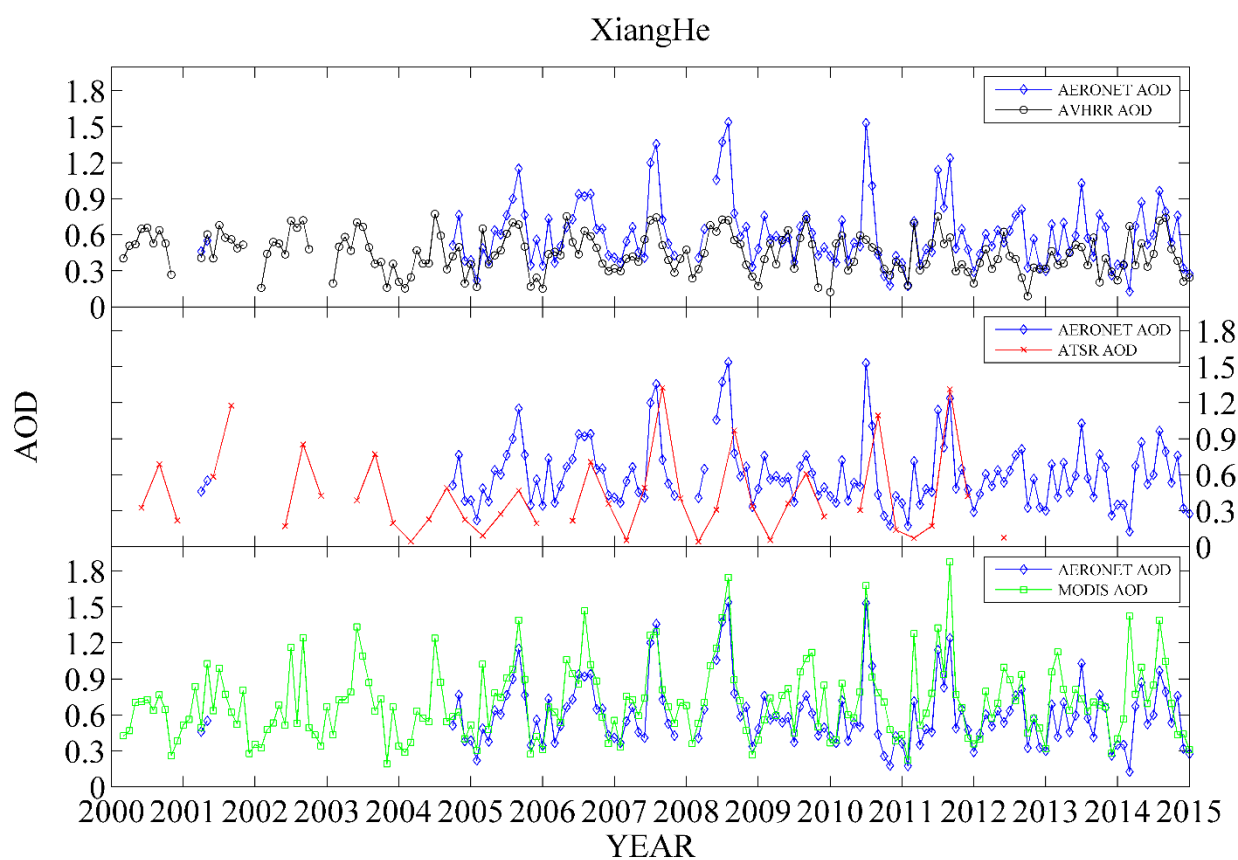

**Figure 5: AOD time series for AVHRR (top), ATSR (middle) and MODIS (bottom), with AERONET AOD (blue) as reference, over the XiangHe site for the years 2000-2015. For ATSR seasonally averaged AOD is plotted, for AVHRR and MODIS the AOD data are monthly averages.**



### 3.3.3 Radiance-derived AOD in Beijing

Figure 6 shows the comparison of the monthly-averaged AOD time series from AVHRR with those derived from radiance data, as well as a comparison of the radiance AOD with AERONET and with MODIS, as reference data. Monthly radiance data at the Beijing site have been validated by Xu et al. (2015) for the years 2002-2012 using both MODIS C5 L3 AOD and AERONET L2 data (version 2). In the current study MODIS C6.1 and AERONET version 3 are used, for the years 2000-2012, and the results from the comparison of the radiance-derived AOD with these data sets, shown in Fig. 7, are similar to those presented in Fig. 2 of Xu et al. (2015). Also the time series in Fig. 6 show very good comparisons between the radiance-derived and MODIS and AERONET AOD. Hence the radiance-derived AOD data provide another reference data set for the AVHRR-retrieved AOD which can be used for the period 1987-2000 as presented in Fig. 8. Figure 8 shows that in this earlier period the AOD was generally lower and the monthly averaged AOD compares better with radiance AOD than for the later period 2000-2012, when AOD was higher during especially the summer months. The overall conclusion remains the same, however, that the AVHRR retrieval needs improvement for high AOD and only values up to about 0.6 can be used.

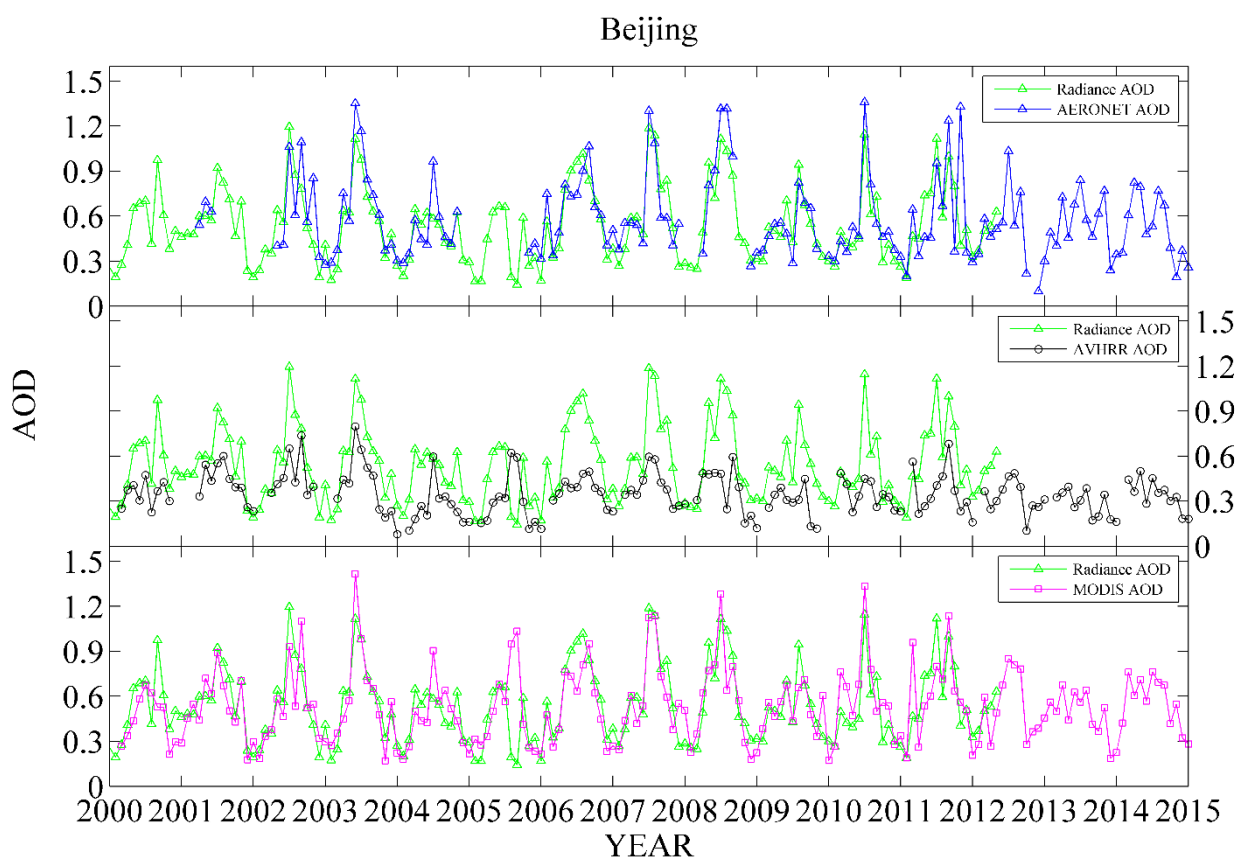

Figure 6: AOD time series for AERONET (top), AVHRR (middle) and MODIS (bottom), with AERONET AOD (blue) as reference, over the Beijing site for the years 2000-2015.

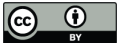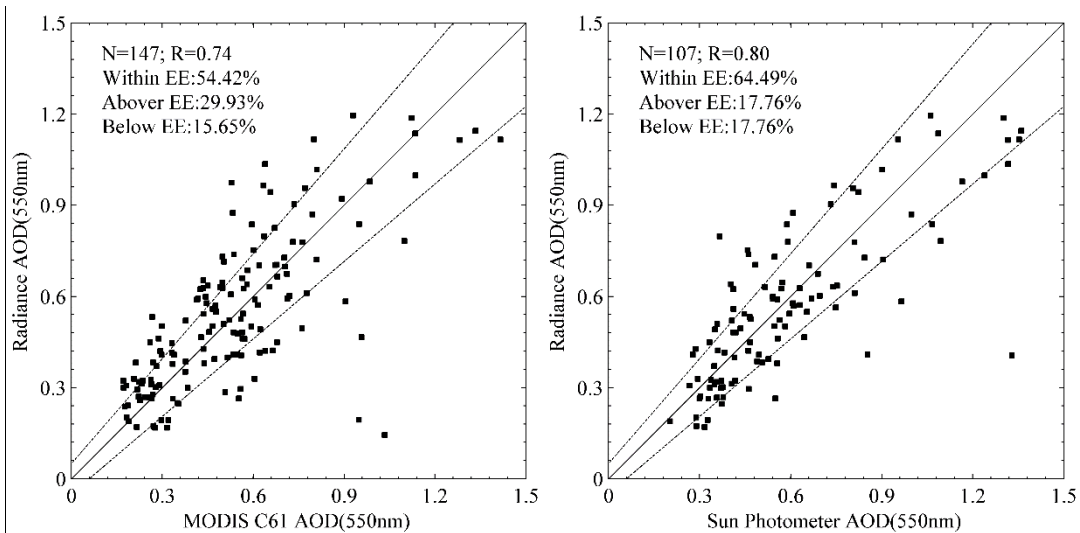

**Figure 7: Scatter plots of radiance retrieved AOD versus MODIS AOD and sunphotometer AOD. The dashed lines show the MODIS expected error of  $\pm(0.05+0.15\tau_{\text{AERONET}})$ .**

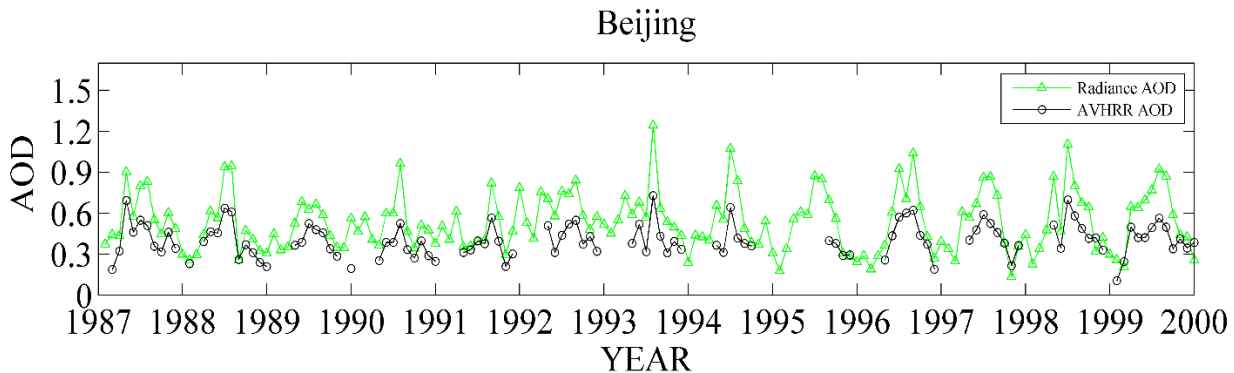

**5 Figure 8: Comparison of radiance-derived and AVHRR-retrieved AOD time series over the Beijing site for the years 1987-2000.**

#### 4 Discussion and conclusion

The validation exercises and time series comparisons presented in Sect. 3 show the stronger and weaker points of the ATSR- and AVHRR-retrieved AOD Climate Data Records (CDRs), with AVHRR being better in the winter and ATSR better in the summer. These differences are also very clear in the direct comparison of the AVHRR and ATSR time series, shown in Fig. 9 for the Beijing site and in Fig. 10 for the XiangHe site. Figure 9 also shows that before 2007 these time series trace quite well and could be combined into a single time series while taking into account the validation results for that period only. In particular the use of the ATSR winter AOD data will have to be considered carefully and may possible have to be given little weight. However, after 2007 large differences are observed with quite high ATSR AOD in the summer while that retrieved from AVHRR has a maximum value of about 0.6. The comparison with MODIS shows that the ATSR AOD values are credible and follow those of MODIS (apart from the shift due the use of seasonal ATSR vs monthly MODIS AOD



averages) , whereas the AVHRR AOD is much too low. In the winter the opposite is observed: ATSR is too low with values close to zero while AVHRR traces MODIS very well.

The intercomparison of the ATSR and AVHRR time series for XiangHe in Fig. 10 shows a similar pattern as for Beijing, with a good comparison before 2007 and a larger summer/winter difference in the ATSR data there-after, resulting in increased discrepancy between the ATSR and AVHRR data sets. However, the comparison with MODIS shows an offset between ATSR and MODIS in the years 2004-2007 which seems to be due to larger overestimation of the MODIS AOD at the XiangHe site than at the Beijing site. Also in some other years the ATSR/MODIS difference appears to be higher in XiangHe than in Beijing, due to higher MODIS AOD. The comparison between AERONET and MODIS AOD data in Figures 4 and 5 show that the difference between the AOD measured at both sites is smaller for AERONET than that for MODIS and hence this may be a MODIS retrieval issue.

In conclusion, the possible combination of the AVHRR and ATSR CDRs, possibly also including MODIS, into a multi-decadal time series is not straightforward. Although MODIS performance is better than that of ATSR and AVHRR, the latter two sensors go back in time before MODIS and hence provide a unique source of information. In addition, none of the satellite sensors performs better than the others at any time and at any location and their combination taking into account the strengths and weaknesses of each of them, may result in a more significant CDR than each of them individually. Furthermore, the comparison shows that before 2007 the AVHRR and ATSR compare quite well and could be used for a meaningful extension of the AOD data records to the early 1980s. However, this conclusion does not apply to the northern sub-region where the surface conditions seem unfavourable for AOD retrieval from ATSR using ADV.



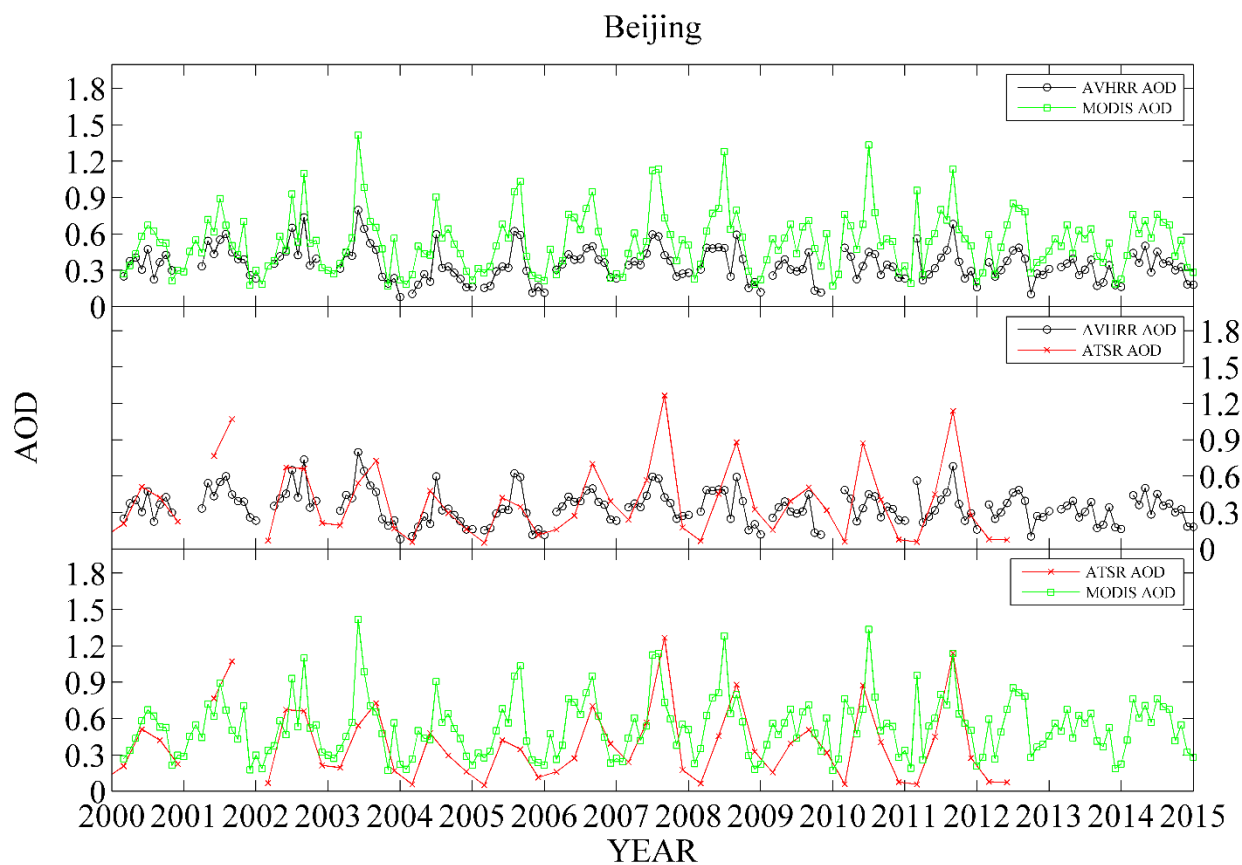

**Figure 9:** Comparison of AOD time series over the Beijing AERONET site retrieved from the satellite sensors AVHRR, MODIS and ATSR, for the overlapping years 2000-2015. Note that for AVHRR and MODIS monthly mean AOD data are plotted, while for ATSR they are seasonal means which may provide a shift in the extreme values.

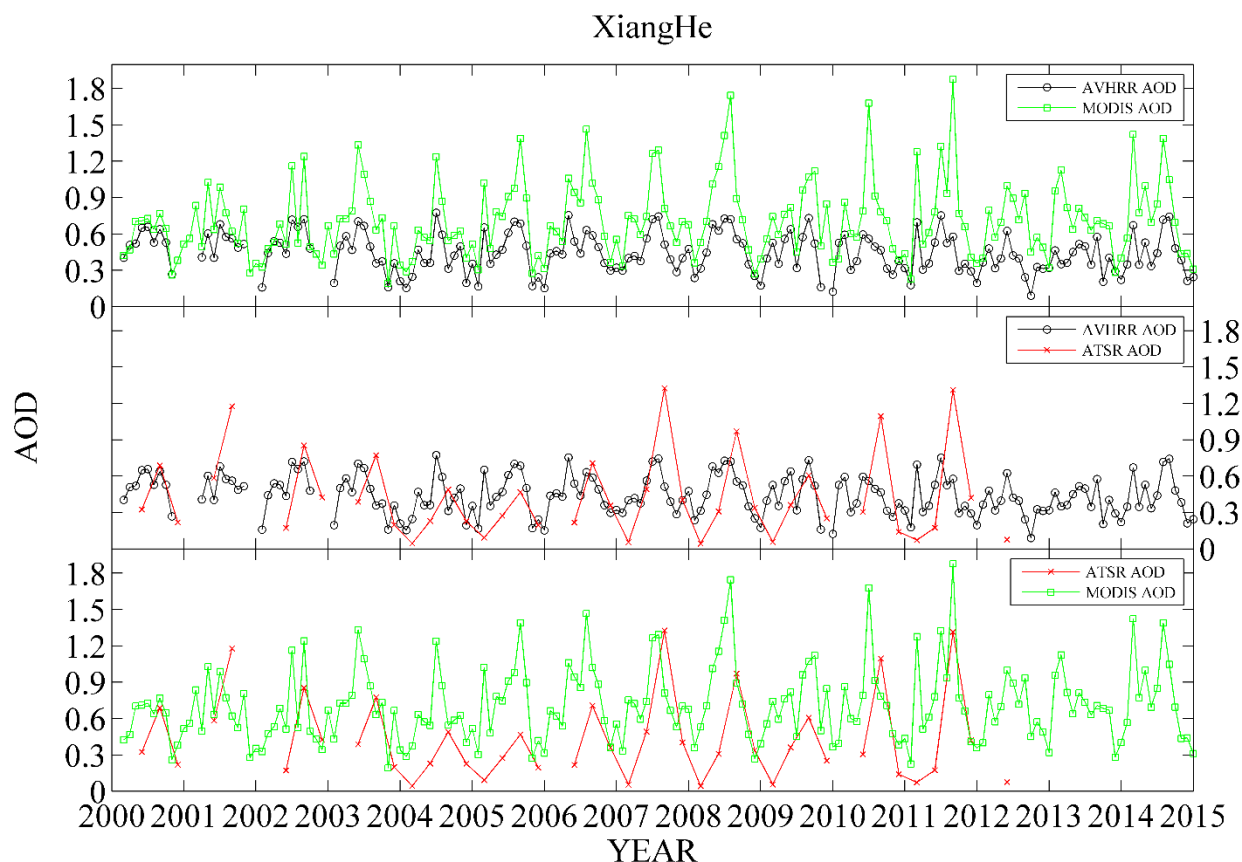

Figure 10: As Fig. 9, over the XiangHe site.

### Acknowledgments

This work was supported in part by the Strategic Priority Research Program of the Chinese Academy of Sciences (grant no. XDA19080303) and the National Natural Science Foundation of China (grant nos. 41471306, 41711530127, 41871260, and 41471303). The authors thank the Academy of Finland, Research Council for Natural Sciences and Engineering, for financial support (project number: 308295). We are thankful to the MODIS data centers for providing access to the data. ATSR AOD data were made available through ICARE. The radiance-derived AOD data were made available under the support of the National Basic Research Program of China (grant no. 2010CB950803). Many thanks are due to the principal investigators of the AERONET, CARSNET, and China National Solar Radiation sites for maintaining their sites and making their data available, and to the AERONET, CARSNET coordination team for organizing and maintaining excellent and essential support for satellite retrieval development and validation.



## References

- Allen, R.C., Durkee, P.A., and Wash, C.H.: Snow/Cloud Discrimination with Multispectral Satellite Measurements, *J. Appl. Meteorol. Clim.*, 29, 994-1004, doi: 10.1175/1520-0450(1990)029<0994:SDWMSM>2.0.CO;2, 1990.
- Alizadeh-Chooari, O., Sturman, A., and Zawar-Reza, P.: A global satellite view of the seasonal distribution of mineral dust and its correlation with atmospheric circulation, *Dynam. Atmos. Oceans*, 68, 20–34, doi: 10.1016/j.dynatmoce.2014.07.002, 2018.
- Ångström, A.: Solar and terrestrial radiation. Report to the international commission for solar research on actinometric investigations of solar and atmospheric radiation, *Q. J. Roy. Meteor. Soc.*, 50, 121-126, doi:10.1002/qj.49705021008, 1924.
- Bai, J., de Leeuw, G., van der A, R., De Smedt, I., Theys, N., Van Roozendaal, M., Sogacheva, L., and Chaia, W.: Variations and photochemical transformations of atmospheric constituents in North China, *Atmos. Environ.*, 189, 213-226, <https://doi.org/10.1016/j.atmosenv.2018.07.004>, 2018.
- Bond, T. C., Doherty, S. J., Fahey, D. W., Forster, P. M., Berntsen, T., DeAngelo, B. J., Flanner, M. G., Ghan, S., Kärcher, B., Koch, D., Kinne, S., Kondo, Y., Quinn, P. K., Sarofim, M. C., Schultz, M. G., Schulz, M., Venkataraman, C., Zhang, H., Zhang, S., Bellouin, N., Guttikunda, S. K., Hopke, P. K., Jacobson, M. Z., Kaiser, J. W., Klimont, Z., Lohmann, U., Schwarz, J. P., Shindell, D., Storelvmo, T., Warren, S. G., and Zender, C. S.: Bounding the role of black carbon in the climate system: A scientific assessment, *J. Geophys. Res.-Atmos.*, 118, 5380–5552, doi: 10.1002/jgrd.50171, 2013.
- Boucher, O., Randall, D., Artaxo, P., Bretherton, C., Feingold, G., Forster, P., Kerminen, V.-M., Kondo, Y., Liao, H., Lohmann, U., Rasch, P., Satheesh, S.K., Sherwood, S., Stevens, B., and Zhang, X.: Clouds and Aerosols. In: *Climate Change 2013: The Physical Science Basis. Contribution of Working Group I to the Fifth Assessment Report of the Intergovernmental Panel on Climate Change*, Cambridge University Press, Cambridge, United Kingdom and New York, NY, USA, 2013.
- Brimblecombe, P.: The Clean Air Act after 50 years, *Weather*, 61, 311–314, doi: 10.1256/wea.127.06, 2006.
- Carn, S. A., Fioletov, V. E., McLinden, C. A., Li, C., and Krotkov, N. A.: A decade of global volcanic SO<sub>2</sub> emissions measured from space, *Sci. Rep.*, 7, 44095, doi: 10.1038/srep44095, 2017.
- Che, H., Zhang, X. Y., Chen, H. B., Damiri, B., Goloub, P., Li, Z. Q., Zhang, X. C., Wei, Y., Zhou, H. G., Dong, F., Li, D. P., and Zhou, T. M.: Instrument calibration and aerosol optical depth validation of the China Aerosol Remote Sensing Network, *J. Geophys. Res.*, 114, D03206, doi:10.1029/2008JD011030, 2009.
- Che, H., Zhang, X.-Y., Xia, X., Goloub, P., Holben, B., Zhao, H., Wang, Y., Zhang, X.-C., Wang, H., Blarel, L., Damiri, B., Zhang, R., Deng, X., Ma, Y., Wang, T., Geng, F., Qi, B., Zhu, J., Yu, J., Chen, Q., and Shi, G.: Ground-based aerosol climatology of China: aerosol optical depths from the China Aerosol Remote Sensing Network (CARSNET) 2002–2013, *Atmos. Chem. Phys.*, 15, 7619–7652, doi: 10.5194/acpd-15-12715-2015, 2015.

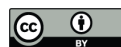

- Che, Y., Xue, Y., Mei, L., Guang, J., She, L., Guo, J., Hu, Y., Xu, H., He, X., Di, A., and Fan, C.: Technical note: Intercomparison of three AATSR Level 2 (L2) AOD products over China, *Atmos. Chem. Phys.*, 16, 9655–9674, doi: 10.5194/acp-16-9655-2016, 2016.
- Chen, J., Li, C., Ristovski, Z., Milic, A., Gu, Y., Islam, M. S., Wang, S., Hao, J., Zhang, H., He, C., Guo, H., Fu, H., Miljevic, B., Morawska, L., Thai, P., LAM, Y. F., Pereira, G., Ding, A., Huang, X., Dumka, U. C.: A review of biomass burning: Emissions and impacts on air quality, health and climate in China, *Sci. Total Environ.*, 579, 1000–1034, doi: 10.1016/j.scitotenv.2016.11.025, 2017.
- Chu, D. A., Kaufman, Y. J., Ichoku, C., Remer, L. A., Tanre, D., and Holben, B. N.: Validation of MODIS aerosol optical depth retrieval over land, dust, *Geophys. Res. Lett.*, 29, MOD2-1–MOD2-4, doi: 10.1029/2001GL013205, 2002.
- de Leeuw, G., Andreas, E. L., Anguelova, M. D., Fairall, C. W., Lewis, E. R., O'Dowd, C., Schulz, M., and Schwartz, S. E.: Production flux of sea spray aerosol, *Rev. Geophys.*, 49, doi: 10.1029/2010RG000349, 2011.
- de Leeuw, G., Holzer-Popp, T., Bevan, S., Davies, W. H., Descloitres, J., Grainger, R. G., Griesfeller, J., Heckel, A., Kinne, S., Klüser, L., Kolmonen, P., Litvinov, P., Martynenko, D., North, P., Ovigneur, B., Pascal, N., Poulsen, C., Ramon, D., Schulz, M., Siddans, R., Sogacheva, L., Tanré D., Thomas, G. E., Virtanen, T. H., von Hoyningen-Huene, W., Vountas, M., and Pinnock, S.: Evaluation of seven European aerosol optical depth retrieval algorithms for climate analysis, *Remote Sens. Environ.*, 162, 295–315, doi:10.1016/j.rse.2013.04.023, 2015.
- de Leeuw, G., Sogacheva, L., Rodriguez, E., Kourtidis, K., Georgoulas, A. K., Alexandri, G., Amiridis, V., Proestakis, E., Marinou, E., Xue, Y., van der A, R.: Two decades of satellite observations of AOD over mainland China using ATSR-2, AATSR and MODIS/Terra: data set evaluation and large-scale patterns, *Atmos. Chem. Phys.*, 18, 1573–1592, doi: 10.5194/acp-18-1573-2018, 2018.
- Eck, T. F., Holben, B. N., Reid, J. S., Dubovik, O., Smirnov, A., O'Neill, N. T., Slutsker, I., and Kinne, S.: Wavelength dependence of the optical depth of biomass burning, urban, and desert dust aerosols, *J. Geophys. Res.-Atmos.*, 104, 31333–31349, doi: 10.1029/1999JD900923, 1999.
- Flowerdew, R. J., and Haigh, J. D.: An approximation to improve accuracy in the derivation of surface reflectance from multi-look satellite radiometers, *Geophys. Res. Lett.*, 23, 1693–1696, doi: 10.1029/95GL01662, 1995.
- Fioletov, V. E., McLinden, C. A., Krotkov, N., Li, C., Joiner, J., Theys, N., Carn, S., and Moran, M. D.: A global catalogue of large SO<sub>2</sub> sources and emissions derived from the Ozone Monitoring Instrument, *Atmos. Chem. Phys.*, 16, 11497–11519, doi: 10.5194/acp-16-11497-2016, 2016.
- Gillette, D.A.: Threshold Friction Velocities for Dust Production for Agricultural Soils. *J. Geophys. Res.-Atmos.*, 93, 12645–12662, doi: 10.1029/JD093iD10p12645, 1988.
- Govaerts, Y.M., Wagner, S., Lattanzio, A., and Watts P.: Joint retrieval of surface reflectance and aerosol optical depth from MSG/SEVIRI observations with an optimal estimation approach: 1. Theory, *J. Geophys. Res.-Atmos.*, 115, D02203, doi:10.1029/2009JD011779, 2010.



- Guerreiro, C.B.B., Foltescu, V., and de Leeuw, F.: Air quality status and trends in Europe, *Atmos. Environ.*, 98, 376–384, doi: 10.1016/j.atmosenv.2014.09.017, 2014.
- Guo, J.P., Zhai, P., Wu, L., Cribb, M., Li, Z., Ma, Z., Wang, F., Chu, D., Wang, P., and Zhang, J.: Precipitation and air pollution at mountain and plain stations in northern China: Insights gained from observations and modeling, *J. Geophys. Res. - Atmos.*, 119 (8), 4793–4807, doi: 10.1002/2013jd021161 2014.
- 5 Guo, J., Deng, M., Lee, S. S., Wang, F., Li, Z., Zhai, P., Liu, H., Lv, W., Yao, W., and Li, X.: Delaying precipitation and lightning by air pollution over the Pearl River Delta. Part I: Observational analyses, *J. Geophys. Res. - Atmos.*, 121, 6472–6488, doi: 10.1002/2015JD023257, 2016a.
- Guo, M., Sun, L., and Xu, X.: Inter-comparison of aerosol optical thickness from MODIS, MISR, and OMI using measurements from solar radiation stations in China, in: *Proceedings of SPIE 9876, Remote Sensing of the Atmosphere, Clouds, and Precipitation VI*, New Delhi, India, 6 September 2016, doi:10.1117/12.2228000, 2016b.
- 10 Guo, J., Liu, H., Li, Z., Rosenfeld, D., Jiang, M., Xu, W., Jiang, J. H., He, J., Chen, D., Min, M., and Zhai, P.: Aerosol-induced changes in the vertical structure of precipitation: a perspective of TRMM precipitation radar, *Atmos. Chem. Phys.*, 18, 13329–13343, <https://doi.org/10.5194/acp-18-13329-2018>, 2018.
- 15 Hao, J., Wang, S., Liu, B., and He, K.: Designation of acid rain and SO<sub>2</sub> control zones and control policies in China, *J. Environ. Sci. Heal A*, 35, 1901–1914, doi: 10.1080/10934520009377085, 2000.
- Hollmann, R., Merchant, C. J., Saunders, R., Downy, C., Buchwitz, M., Cazenave, A., Chuvieco, E., Defourny, P., de Leeuw, G., Forsberg, R., Holzer-Popp, T., Paul, F., Sandven, S., Sathyendranath, S., van Roozendaal, M., and Wagner, W.: The ESA climate change initiative: satellite data records for essential climate variables, *B. Am. Meteorol. Soc.*, 94, 1541–1552, doi: 10.1175/BAMS-D-11-00254.1, 2013.
- 20 Holzer-Popp, T., de Leeuw, G., Griesfeller, J., Martynenko, D., Klüser, L., Bevan, S., Davies, W., Ducos, F., Deuzé J. L., Gaigner, R. G., Heckel, A., von Hoyningen-Hüne, W., Kolmonen, P., Litvinov, P., North, P., Poulsen, C. A., Ramon, D., Siddans, R., Sogacheva, L., Tanre, D., Thomas, G. E., Vountas, M., Desclotres, J., Griesfeller, J., Kinne, S., Schulz, M., and Pinnock, S.: Aerosol retrieval experiments in the ESA Aerosol\_cci project, *Atmos. Meas. Tech.*, 6, 1919–1957, doi:10.5194/amt-6-1919-2013, 2013.
- 25 Hsu, N. C., Tsay, S. -C., King, M. D., and Herman, J. R.: Aerosol properties over bright-reflecting source regions, *IEEE T. Geosci. Remote*, 42, 557–569, doi: 10.1109/TGRS.2004.824067, 2004.
- Hsu, N. C., Jeong, M.-J., Bettenhausen, C., Sayer, A. M., Hansell, R., Seftor, C. S., Huang, J., and Tsay, S.-C.: Enhanced Deep Blue aerosol retrieval algorithm: The second generation, *J. Geophys. Res. Atmos.*, 118, 9296–9315, doi:10.1002/jgrd.50712, 2013.
- 30 Hsu, N. C., Lee, J., Sayer, A. M., Carletta, N., Chen, S.-H., Tucker, C. J., Holben, B. N., and Tsay, S.-C.: Retrieving Near-Global Aerosol Loading over Land and Ocean from AVHRR, *J. Geophys. Res. Atmos.*, 122, doi:10.1002/2017JD026932, 2017.



- Ichoku, C, D. A. Chu, Mattoo, S., Kaufman, Y. J., Remer, L. A., Tanre, D., Slutsker, I., and Holben, B. N.: A spatio-temporal approach for global validation and analysis of MODIS aerosol products, *Geophys. Res. Lett.*, 29, MOD1-1-MOD1-4, doi: 10.1029/2001GL013206, 2002.
- Kaiser, J. W., Heil, A., Andreae, M. O., Benedetti, A., Chubarova, N., Jones, L., Morcrette, J.-J., Razinger, M., Schultz, M.  
5 G., Suttie, M., and van der Werf, G. R.: Biomass burning emissions estimated with a global fire assimilation system based on observed fire radiative power, *Biogeosciences*, 9, 527-554, <https://doi.org/10.5194/bg-9-527-2012>, 2012.
- Kang, H., Zhu, B., van der A. R., Zhu, C., de Leeuw, G., Hou, X., and Gao, J.: Natural and anthropogenic contributions to long-term variations of SO<sub>2</sub>, NO<sub>2</sub>, CO, and AOD over East China, *Atmos. Environ.*, 215, 284-293, <https://doi.org/10.1016/j.atmosres.2018.09.012>, 2018.
- 10 Kaufman, Y. J., Wald, A. E., Remer, L. A., Gao, B. C., Li, R. R., and Flynn, L.: The MODIS 2.1- $\mu$ m channel - Correlation with visible reflectance for use in remote sensing of aerosol, *IEEE T. GEOSCI. REMOTE*, 35, 1286-1298, doi: 10.1109/36.628795, 1997.
- Koren, I., Dagan, G., and Altaratz, O.: From aerosol-limited to invigoration of warm convective clouds, *Science*, 344(6188), 1143-1146, 2014.
- 15 Kolmonen, P., Sogacheva, L., Virtanen, T.H., de Leeuw, G., and Kulmala, M.: The ADV/ASV AATSR aerosol retrieval algorithm: current status and presentation of a full-mission AOD data set, *Int. J. Digit. Earth*, 9:6, 545-561, doi: 10.1080/17538947.2015.1111450, 2016.
- Levy, R. C., Remer, L. A., Kleidman, R. G., Mattoo, S., Ichoku, C., Kahn, R., and Eck, T. F.: Global evaluation of the Collection 5 MODIS dark-target aerosol products over land, *Atmos. Chem. Phys.* 10, 10399-10420, doi:10.5194/acp-  
20 10-10399-2010, 2010.
- Levy, R. C., Mattoo, S., Munchak, L. A., Remer, L. A., Sayer, A. M., Patadia, F., and Hsu, N. C.: The Collection 6 MODIS aerosol products over land and ocean, *Atmos. Meas. Tech.*, 6, 2989-3034, doi:10.5194/amt-6-2989-2013, 2013.
- Levy, R. C., Munchak, L. A., Mattoo, S., Patadia, F., Remer, L. A., and Holz, R. E.: Towards a long-term global aerosol optical depth record: applying a consistent aerosol retrieval algorithm to MODIS and VIIRS-observed reflectance,  
25 *Atmos. Meas. Tech.*, 8, 4083-4110, <https://doi.org/10.5194/amt-8-4083-2015>, 2015.
- Li, J., Liu, R., Liu, S., Shiu, C., Wang, J., and Zhang, Y.: Trends in aerosol optical depth in northern China retrieved from sunshine duration data, *Geophys. Res. Lett.*, 43, 431-439, doi: 10.1002/2015GL067111, 2016.
- Li, Z., Guo, J., Ding, A., Liao, H., Liu, J., Sun, Y., Wang, T., Xue, H., Zhang, H., and Zhu B.: Aerosol and boundary-layer interactions and impact on air quality, *Natl. Sci. Rev.*, 4, 810-833, doi: 10.1093/nsr/nwx117, 2017a.
- 30 Li, Z., Xu, H., Li, K. T., Li, D. H., Xie, Y. S., Li, L., Zhang, Y., Gu, X. F., Zhao, W., Tian, Q. J., Deng, R. R., Su, X. L., Huang, B., Qiao, Y. L., Cui, W. Y., Hu, Y., Gong, C. L., Wang, Y. Q., Wang, X. F., Wang, J. P., Du, W. B., Pan, Z. Q., Li, Z. Z., and Bu, D.: Comprehensive study of optical, physical, chemical and radiative properties of total columnar atmospheric aerosols over China: An overview of Sun-sky radiometer Observation NETwork (SONET) measurements, *Bull. Amer. Meteor. Soc.*, doi:10.1175/BAMS-D-17-0133.1, 2018.





- Lu, S., Lin, H., Heemink, A., Segers, A., and Fu, G.: Estimation of volcanic ash emissions through assimilating satellite data and ground-based observations, *J. Geophys. Res. Atmos.*, 121, 10971–10994, doi:10.1002/2016JD025131, 2016.
- Miao, Y., Guo, J., Liu, S., Liu, H., Zhang, G., Yan, Y., and He, J.: Relay transport of aerosols to Beijing-Tianjin-Hebei region by multi-scale atmospheric circulations, *Atmos. Environ.*, 165, 35-45, doi: 10.1016/j.atmosenv.2017.06.032, 2017.
- Miller, D. J., Sun, K., Zondlo, M. A., Kanter, D., Dubovik, O., Welton, E. J., Winker, D. M., and Ginoux, P.: Assessing boreal forest fire smoke aerosol impacts on U.S. air quality: A case study using multiple data sets, *J. Geophys. Res.*, 116, D22209, doi:10.1029/2011JD016170, 2011.
- 10 O’Dowd, C.D., and de Leeuw, G.: Marine Aerosol Production: a review of the current knowledge, *Phil. Trans. R. Soc. A*, 365, 1753–1774, doi:10.1098/rsta.2007.2043, 2007.
- Oertel, C., Matschullat, J., Zurba, K., Zimmermann, F., and Erasmi, S.: Greenhouse gas emissions from soils—A review, *Chem. Erde-Geochem.*, 76, 327–352. <http://dx.doi.org/10.1016/j.chemer.2016.04.002>, 2016.
- Popp, T., de Leeuw, G., Bingen, C., Brühl, C., Capelle, V., Chedin, A., Clarisse, L., Dubovik, O., Grainger, R., Griesfeller, J., Heckel, A., Kinne, S., Klüser, L., Kosmale, M., Kolmonen, P., Lelli, L., Litvinov, P., Mei, L., North, P., Pinnock, S., Povey, A., Robert, C., Schulz, M., Sogacheva, L., Stebel, K., Stein Zweers, D., Thomas, G., Tilstra, L.G., Vandembussche, S., Veeffkind, P., Vountas, M., and Xue, Y.: Development, production and evaluation of aerosol Climate Data Records from European satellite observations (Aerosol\_cci), *Remote Sens.*, 8, 421, doi:10.3390/rs8050421, 2016.
- 15 Qiu, J.: A Method to Determine Atmospheric Aerosol Optical Depth Using Total Direct Solar Radiation, *J. Atmos. Sci.*, 55, 744-757, doi: 10.1175/1520-0469(1998)055<0744:AMTDAA>2.0.CO;2, 1998.
- Remer, L. A., Kaufman, Y. J., Tanré D., Mattoo, S., Chu, D. A., Martins, J. V., Li, R.-R., Ichoku, C., Levy, R. C., Kleidman, R. G., Eck, T. F., Vermote, E., and Holben, B. N.: The MODIS aerosol algorithm, products, and validation, *J. Atmos. Sci.*, 62, 947–973, doi: <http://dx.doi.org/10.1175/JAS3385.1>, 2005.
- 25 Riffler, M., Popp, C., Hauser, A., Fontana, F., and Wunderle, S.: Validation of a modified AVHRR aerosol optical depth retrieval algorithm over Central Europe, *Atmos. Meas. Tech.*, 3, 1255-1270, 2010.
- Salomonson, V. V., Barnes, W. L., Maymon, P. W., Montgomery, H. E., Ostrow, H.: MODIS - Advanced facility instrument for studies of the earth as a system, *IEEE T. Geosci. Remote*, 27, 145-153, doi: 10.1109/36.20292, 1989.
- Sayer, A. M., Hsu, N. C., Bettenhausen, C., and Jeong, M.-J.: Validation and uncertainty estimates for MODIS Collection 6 “Deep Blue” aerosol data, *J. Geophys. Res. Atmos.*, 118, 7864–7872, doi:10.1002/jgrd.50600, 2013.
- 30 Sayer, A. M., Munchak, L. A., Hsu, N. C., Levy, R. C., Bettenhausen, C., and Jeong, M.-J.: MODIS Collection 6 aerosol products: Comparison between Aqua’s e-Deep Blue, Dark Target, and “merged” data sets, and usage recommendations, *J. Geophys. Res. Atmos.*, 119, 13965–13989, doi: 10.1002/2014JD022453, 2014.



- Sayer, A. M., Hsu, N. C., Bettenhausen, C., Jeong, M.-J., and Meister, G.: Effect of MODIS Terra radiometric calibration improvements on Collection 6 Deep Blue aerosol products: Validation and Terra/Aqua consistency, *J. Geophys. Res. Atmos.*, 120, 12157-12174, doi: 10.1002/2015JD023878, 2015.
- Sayer, A. M., Hsu, N. C., Lee, J., Carletta, N., Chen, S. -H., and Smirnov, A.: Evaluation of NASA Deep Blue/SOAR aerosol retrieval algorithms applied to AVHRR measurements, *J. Geophys. Res. Atmos.*, doi: 10.1002/2017JD026934, doi:10.1002/2017JD026934, 2017.
- Seinfeld, J. H., Pandis, S. N., and Noone, K.: Atmospheric Chemistry and Physics: From Air Pollution to Climate Change, *Phys. Today*, 51, 88, doi: 10.1063/1.882420, 1998.
- Sogacheva, L., Kolmonen, P., Virtanen, T. H., Rodriguez, E., Saponaro, G., and de Leeuw, G.: Post-processing to remove residual clouds from aerosol optical depth retrieved using the Advanced Along Track Scanning Radiometer, *Atmos. Meas. Tech.*, 10, 491-505, doi:10.5194/amt-10-491-2017, 2017.
- Sogacheva, L., de Leeuw, G., Rodriguez, E., Kolmonen, P., Georgoulas, A. K., Alexandri, G., Kourtidis, K., Proestakis, E., Marinou, E., Amiridis, V., Xue, Y., and van der A, R. J.: Spatial and seasonal variations of aerosols over China from two decades of multi-satellite observations – Part 1: ATSR (1995–2011) and MODIS C6.1 (2000–2017), *Atmos. Chem. Phys.*, 18, 11389-11407, <https://doi.org/10.5194/acp-18-11389-2018>, 2018a.
- Sogacheva, L., Rodriguez, E., Kolmonen, P., Virtanen, T. H., Saponaro, G., de Leeuw, G., Georgoulas, A. K., Alexandri, G., Kourtidis, K., and van der A, R. J.: Spatial and seasonal variations of aerosols over China from two decades of multi-satellite observations. Part II: AOD time series for 1995–2017 combined from ATSR ADV and MODIS C6.1 for AOD tendencies estimation, *Atmos. Chem. Phys. Discuss.*, <https://doi.org/10.5194/acp-2018-288>, in review, 2018b.
- Stark, M. S., Harrison, J. T. H., Anastasi, C.: The formation of nitrogen oxides by electrical discharges and implications for atmospheric lightning, *J. Geophys. Res.-Atmos.*, 101, 6963-6969, doi: 10.1029/95JD03008, 1996.
- Stavrakou, T., Müller, J.-F., Bauwens, M., De Smedt, I., Lerot, C., Van Roozendaal, M., Coheur, P.-F., Clerbaux, C., Boersma, K. F., van der A. R., and Song Y.: Substantial Underestimation of Post-Harvest Burning Emissions in the North China Plain Revealed by Multi-Species Space Observations, *Sci. Rep.-UK*, 6, 32307, doi: 10.1038/srep32307, 2016.
- Stowe, L. L., McClain, E. P., Carey, R., Pellegrino, P., Gutman, G. G., Davis, P., Long, C., and Hart, S.: Global distribution of cloud cover derived from NOAA/AVHRR operational satellite data, *Adv. Space Res.*, 11, 51–54, doi: 10.1016/0273-1177(91)90402-6, 1991.
- Stowe, L.L., Davis, P.A., and McClain, E.P.: Scientific basis and initial evaluation of the CLAVR-1 global clear cloud classification algorithm for the advanced very high resolution radiometer, *J. Atmos. Ocean Technol.*, 16, 656–681, [https://doi.org/10.1175/1520-0426\(1999\)016<0656:SBAIEO>2.0.CO;2](https://doi.org/10.1175/1520-0426(1999)016<0656:SBAIEO>2.0.CO;2), 1999.
- Sundström, A.-M., Kolmonen, P., Sogacheva L., and de Leeuw, G.: Aerosol retrievals over China with the AATSR Dual-View Algorithm, *Remote Sens. Environ.*, 116, 189-198, doi: 10.1016/j.rse.2011.04.041, 2012.



- Tanré D., Kaufman, Y. J., Herman, M., and Mattoo, S.: Remote sensing of aerosol properties over oceans using the MODIS/EOS spectral radiances, *J. Geophys. Res. Atmos.*, 102, 16971-16988, doi: 10.1029/96JD03437, 1997.
- Theys, N., Campion, R., Clarisse, L., Brenot, H., van Gent, J., Dils, B., Corradini, S., Merucci, L., Coheur, P.-F., Van Roozendaal, M., Hurtmans, D., Clerbaux, C., Tait, S., and Ferrucci, F.: Volcanic SO<sub>2</sub> fluxes derived from satellite data: a survey using OMI, GOME-2, IASI and MODIS, *Atmos. Chem. Phys.*, 13, 5945-5968, <https://doi.org/10.5194/acp-13-5945-2013>, 2013.
- van der A, R. J., Mijling, B., Ding, J., Koukouli, M. E., Liu, F., Li, Q., Mao, H., and Theys, N.: Cleaning up the air: effectiveness of air quality policy for SO<sub>2</sub> and NO<sub>x</sub> emissions in China, *Atmos. Chem. Phys.*, 17, 1775-1789, doi:10.5194/acp-17-1775-2017, 2017.
- 10 Veefkind, J.P., de Leeuw, G., and Durkee, P.A: Retrieval of aerosol optical depth over land using two-angle view satellite radiometry during TARFOX, *Geophys. Res. Letters*, 25, 3135-3138, doi: 10.1029/98GL02264, 1998.
- WHO (2018), World Health Organization: [http://www.who.int/phe/health\\_topics/outdoorair/databases/en/](http://www.who.int/phe/health_topics/outdoorair/databases/en/), last accessed 16 July 2018.
- Wang, Y., Yao, L., Wang, L., Liu Z., Ji, D., Tang, G., Zhang, J., Sun, Y., Hu, B., and Xin, J.: Mechanism for the formation of the January 2013 heavy haze pollution episode over central and eastern China, *Sci. China Earth Sci.*, 57, 12-25, doi: 10.1007/s11430-013-4773-4, 2013.
- 15 Xin, J., Wang, Y., Pan. Y., Ji, D., Liu, Z., Wen, T., Wang, Y., Li, X., Sun, Y., Sun J., Wang P., Wang G., Wang X., Cong Z., Song T., Hu B., Wang L., Tang G., Gao W., Guo Y., Miao H., Tian S., and Wang L., The Campaign on Atmospheric Aerosol Research Network of China: CARE-China, *Bull. Amer. Meteor. Soc.*, 96, 1137–1155, doi: 10.1175/BAMS-D-14-00039.1, 2015.
- 20 Xu, X., Qiu, J., Xia, X., Sun, L., and Min M.: Characteristics of atmospheric aerosol optical depth variation in China during 1993-2012, *Atmos. Environ.*, 119, 82-94, doi: 10.1016/j.atmosenv.2015.08.042, 2015.
- Xue, Y., He, X., de Leeuw, G., Mei, L., Che, Y., Rippin, W., Guang, J., and Hu, Y. : Long-time series aerosol optical depth retrieval from AVHRR data over land in North China and Central Europe, *Remote Sens. Environ.*, 198, 471-489, doi: 10.1016/j.rse.2017.06.036, 2017.
- 25 Yim S.H.L., Hou X., Guo J., Yang Y.: Contribution of local emissions and transboundary air pollution to air quality in Hong Kong during El Niño-Southern Oscillation and heatwaves, *Atmos. Res.*, 218, 50-58, <https://doi.org/10.1016/j.atmosres.2018.10.021>, 2019.
- Yu, Y., Kalashnikova, O. V., Garay, M. J., Lee, H., and Notaro, M.: Identification and characterization of dust source regions across North Africa and the Middle East using MISR satellite observations, *Geophys. Res. Lett.*, 45, doi: 10.1029/2018GL078324, 2018.
- 30 Zhang, L., Liu, Y. and Hao, L.: Contributions of open crop straw burning emissions to PM<sub>2.5</sub> concentrations in China. *Environ. Res. Lett.*, 11, 014014, doi:10.1088/1748-9326/11/1/014014, 2016.



- Zhang, J., Reid, J.S., Alfaro-Contreras, R., and Xian, P.: Has China been exporting less particulate air pollution over the past decade? *Geophys. Res. Lett.*, 44, 2941–2948, doi:10.1002/2017GL072617, 2017.
- Zhao, T. X.-P., Laszlo, I., Guo, W., Heidinger, A., Cao, C., Jelenak, A., Tarpley, D., and Sullivan, J.: Study of long-term trend in aerosol optical thickness observed from operational AVHRR satellite instrument, *J. Geophys. Res.*, 113, D07201, doi:10.1029/2007JD009061, 2008.
- 5 Zhao, B., Jiang, J.H., Gu, Y., Diner, D., Worden, J., Liou, K.-N., Su, H., Xing, J., Garay, M., and Huang, L.: Decadal-scale trends in regional aerosol particle properties and their linkage to emission changes, *Environ. Res. Lett.*, 12, 054021(2017), doi.org/10.1088/1748-9326/aa6cb2, 2017.
- Zheng, B., Tong, D., Li, M., Liu, F., Hong, C., Geng, G., Li, H., Li, X., Peng, L., Qi, J., Yan, L., Zhang, Y., Zhao, H., Zheng, Y., He, K., and Zhang, Q.: Trends in China's anthropogenic emissions since 2010 as the consequence of clean air actions, *Atmos. Chem. Phys. Discuss.*, <https://doi.org/10.5194/acp-2018-374>, in review, 2018.
- 10

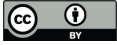

## Appendix A

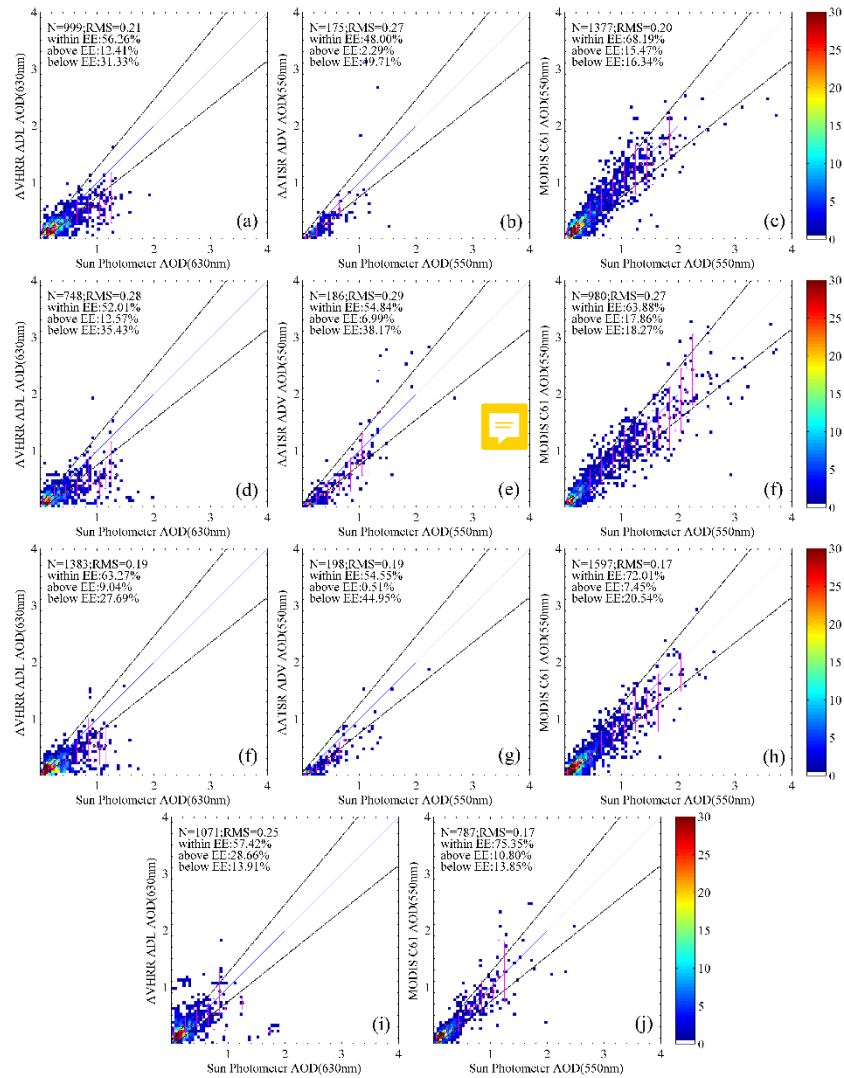

Figure A1: Seasonal scatter density plots of satellite AOD versus sun photometer AOD. (a), (d), (f), and (i) are AVHRR AOD vs. AERONET AOD in Spring, Summer, Autumn, and Winter; (b), (e), and (g) are ATSR AOD vs. AERONET AOD in Spring, Summer, and Autumn; (c), (f), (h), and (j) are MODIS AOD vs. AERONET AOD in Spring, Summer, Autumn, and Winter.

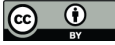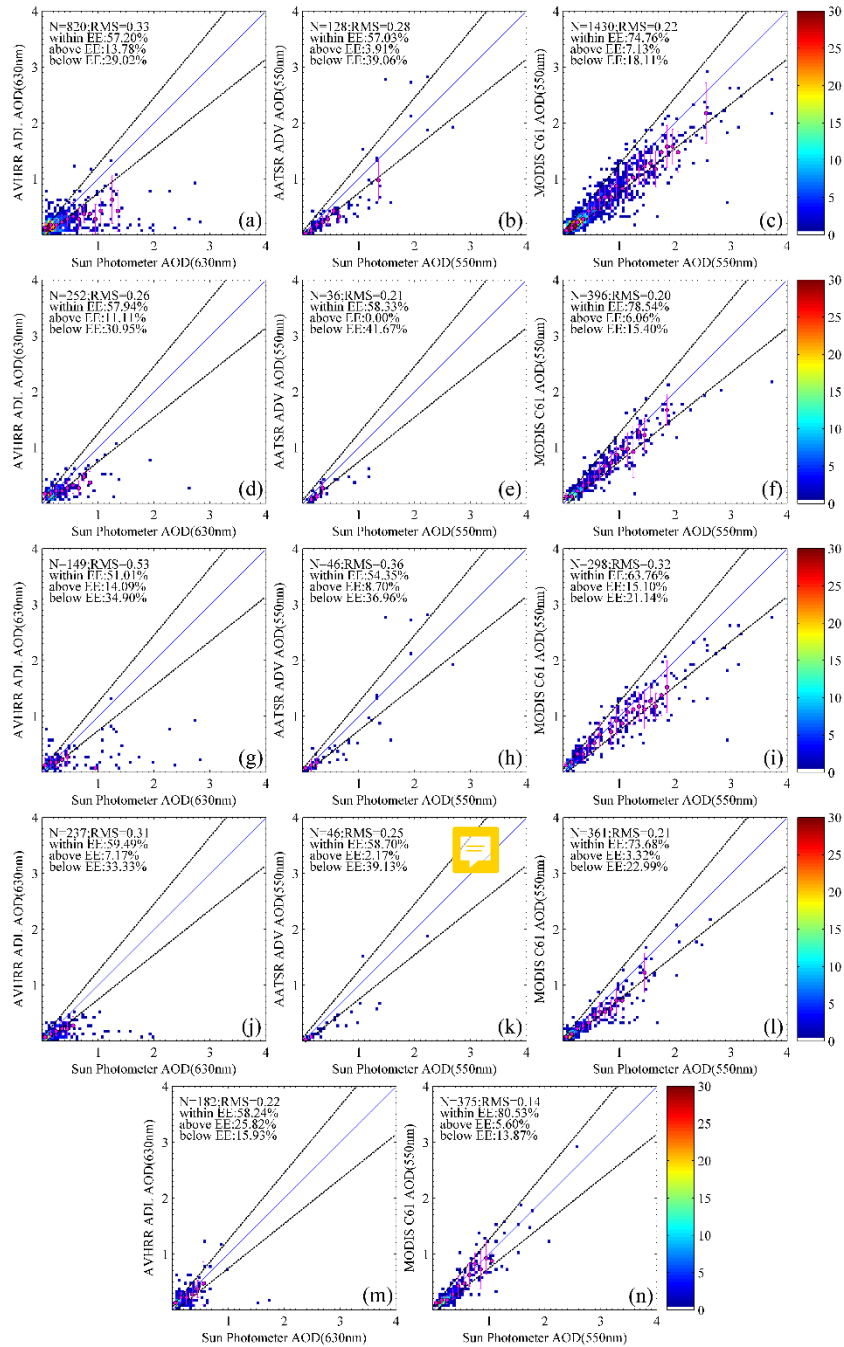

**Figure A2:** Scatter density plots of satellite-retrieved AOD versus sunphotometer retrieved AOD data from Beijing station. ADL all data (a), in Spring (d), in Summer (g), in Autumn (j), and in Winter (m) vs. AERONET, ADV all data (b), in Spring (e), in Summer (h), and in Autumn (k) vs. AERONET, MODIS all data (c), in Spring (f), in Summer (i), in Autumn (l), and in Winter (n) vs. AERONET.

5



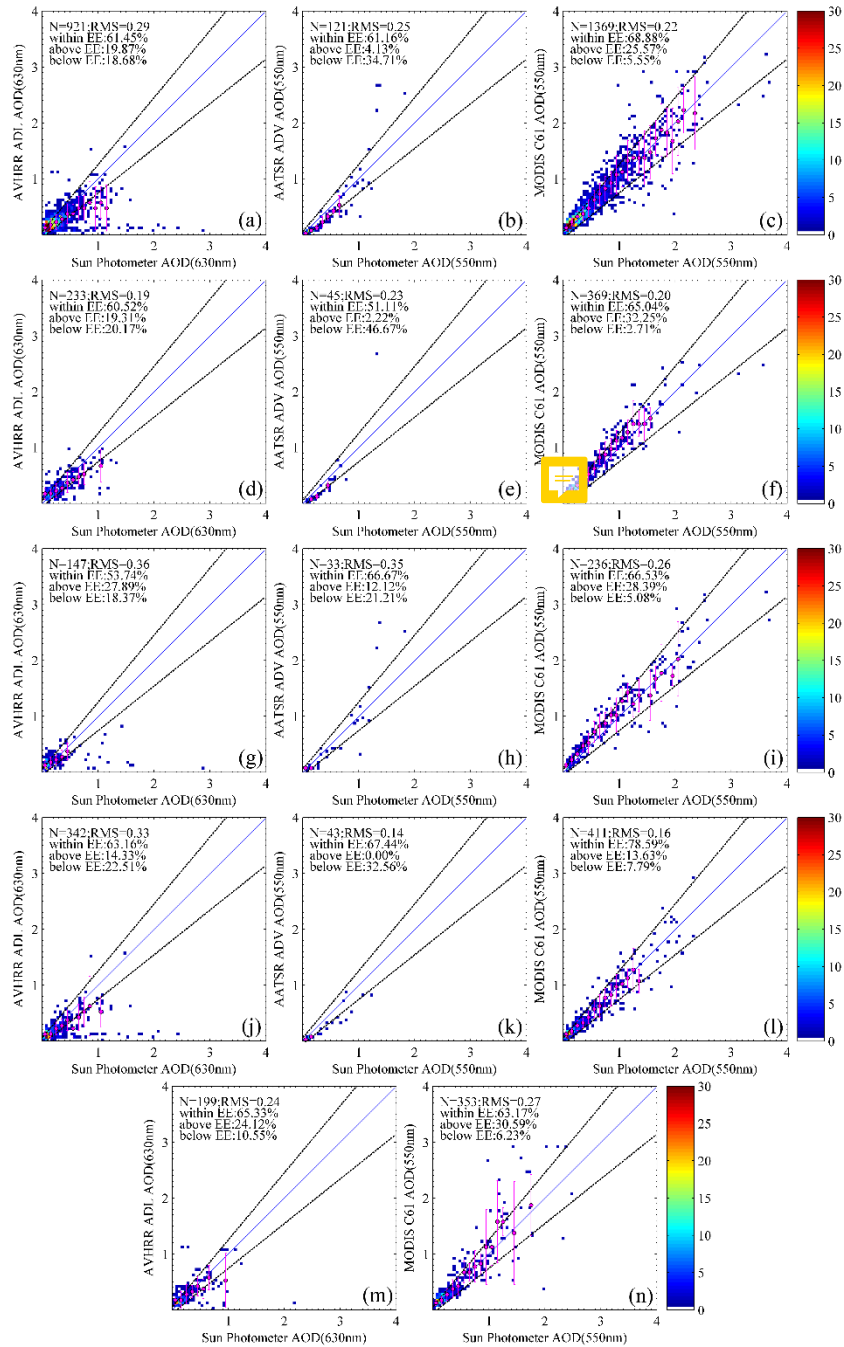

**Figure A3:** Scatter density plots of satellite-retrieved AOD versus sunphotometer retrieved AOD data from XiangHe station. ADL all data (a), in Spring (d), in Summer (g), in Autumn (j), and in Winter (m) vs. AERONET, ADV all data (b), in Spring (e), in Summer (h), and in Autumn (k) vs. AERONET, MODIS all data (c), in Spring (f), in Summer (i), in Autumn (l), and in Winter (n) vs. AERONET.

5
